# Supplementary material
Source: PubMed Central journal article supplement (PMC6584318)
Supplement: jamasurg-153-427-s001.pdf [file jamasurg-153-427-s001.pdf]

## Supplementary Online Content

Courcoulas AP, King WC, Belle SH, et al. Seven-Year Weight Trajectories and Health Outcomes in the Longitudinal Assessment of Bariatric Surgery (LABS) Study. *JAMA Surg*. Published online December 6, 2017. doi:10.1001/jamasurg.2017.5025

**eAppendix 1.** Statistical Analysis Methods

**eAppendix 2.** Sensitivity Analysis of Missing at Random Assumption

**eFigure 1.** Flow of Participants through Recruitment, Follow-up, and Weight Measurements

**eFigure 2.** Incidence of Comorbid Conditions Following Bariatric Surgery

**eTable 1.** Baseline Characteristics of LABS-2 Participants

**eTable 2.** Observed and Modeled Percent Weight Change, by Time Point in Relation to Bariatric Surgery

**eTable 3.** Observed Prevalence, Remission and Incidence of Comorbidities, by Time Point in Relation to Bariatric Surgery

**eTable 4.** Modeled Prevalence, Remission, and Incidence of Comorbidities, by Time Point in Relation to Bariatric Surgery

**eTable 5.** Modeled Percent Weight Change and Subsequent Bariatric Procedures after Initial Bariatric Procedure by Weight Trajectory Group Membership

**eTable 6.** Baseline Characteristics by Weight Trajectory Group

**eTable 7.** Remission of Comorbid Conditions

This supplementary material has been provided by the authors to give readers additional information about their work.

## eAppendix 1. Statistical Analysis Methods

Descriptive statistics summarize baseline characteristics and outcomes by time point. Frequencies and percentages are reported for categorical data. Medians, 25th and 75th percentiles, the difference between the latter being interquartile ranges (IQRs), are reported for continuous data.

The rates of death and of subsequent bariatric procedures were estimated by dividing the number of participants with events known to occur within 7 years of the initial bariatric surgery by the number of person-years (PYR) of observation. We report the rates per 1000 person-years, a standard unit, and per 700 person-years, which correspond to the number of persons with the event, expected if 100 people were followed for 7 years. Exact confidence intervals for rates were constructed using the Poisson distribution

Longitudinal analyses were performed using mixed models with a person-level random intercept controlling for site, baseline age, and smoking status, which were associated with missing follow-up data,<sup>1</sup> as fixed effects (specifics follow). Sensitivity analyses were performed to examine the robustness of results with respect to the missing at random assumption of the mixed models. Among those missing versus not missing an outcome (i.e., mean percent weight change or comorbidity prevalence) at a particular follow-up assessment, the outcome was similar, in general, at other follow-up assessments (**eAppendix 2 Tables 1 and 2**).

Linear mixed models via maximum likelihood were used to estimate change in weight (kg and percent weight change), with time (follow-up assessment) as a discrete fixed effect. Modeled means and 95% confidence intervals (CI) are reported by post-surgery follow-up assessment. Weight stability beyond three years was evaluated by limiting the dataset to years 3 to 7 and testing for linear and quadratic trends with time (days since surgery) as a continuous fixed effect in linear mixed models of weight change. Linear mixed models were also used to test whether change in percent weight change was significantly different from 0 between year-3 and year-7.

Poisson mixed models with robust error variance were used to estimate prevalence, remission and incidence of comorbidities with time (follow-up assessment) as a discrete fixed effect. Modeled proportions and 95% CI are reported by post-surgery follow-up assessment. To assess the long-term effect, a pairwise comparison was made between baseline and year 7 prevalence. Prevalence, remission and incidence stability beyond three years were evaluated by limiting the dataset to years 3 to 7 and testing for linear and quadratic trends using time (days since surgery) as a continuous fixed effect in Poisson mixed models with robust error variance adjusting for previously mentioned factors.

Growth mixture models<sup>2,3</sup> were used to estimate weight change trajectories for each participant and to group participants with similar modeled trajectories. The smallest trajectory group was constrained to include at least 5% of the sample. The best fitting model was determined using the Bayesian information criterion. The modeled group trajectories are plotted. Trajectory-specific weight stability beyond 3 years was evaluated using the methodology described above. Associations between participant baseline characteristics and weight trajectory group membership were evaluated with the Cochran-Armitage Trend Test, Kendall's Tau-b, and Jonckheere-Terpstra trend test.

Among participants who underwent RYGB, Poisson mixed models with robust error variance were used to test and estimate associations between weight trajectory group membership with remission of each comorbidity, with weight trajectory group, time and a time x weight trajectory group interaction term entered as fixed effects. Observed remission percentages and adjusted relative risks of remission by RYGB weight trajectory group and post-surgery follow-up assessment are reported.

Analyses were conducted using SAS version 9.4 (SAS Institute, Cary, NC, USA). All reported P values are

two-sided; P values less than 0.05 were considered to be statistically significant.

## References

1. King WC, Chen JY, Belle SH, et al. Change in Pain and Physical Function Following Bariatric Surgery for Severe Obesity. *JAMA*. Apr 5 2016;315(13):1362-1371.
2. Courcoulas AP, Christian NJ, Belle SH, et al. Weight change and health outcomes at 3 years after bariatric surgery among individuals with severe obesity. *JAMA*. Dec 11 2013;310(22):2416-2425.
3. Wang J, Wang X. Structural equation modeling: applications using Mplus. Chichester, West Sussex England; Hoboken, N.J.: John Wiley/Higher Education Press; 2012.

## **eAppendix 2.** Sensitivity Analysis of Missing at Random Assumption

A sensitivity analysis was performed to examine the robustness of results with respect to the missing at random assumption for percent weight change and comorbidity status. A linear mixed model was constructed for each follow-up assessment to test whether missing weight at that assessment (yes/no), entered as a fixed effect, was related to percent weight change, with time entered as a fixed effect. Models included a person-level random intercept, and controlled for site, baseline age, and smoking status, which were associated with missing follow-up data, as fixed effects. Among those missing versus not missing weight at each follow-up assessment, the mean value at other follow-up time points was similar (**eAppendix 2 Table 1**). This process was repeated for comorbidity prevalence using Poisson mixed models with robust error variance. Among those missing versus not missing each comorbidity at each follow-up assessment, the prevalence at other follow-up time points was similar, in general (**eAppendix 2 Table 2**). However, those with missing high low-density lipoprotein (LDL) status in years 1-5 appeared to have slightly lower prevalence of high LDL at other non-missing time points, suggesting modeled high LDL prevalence might have been overestimated.

**eAppendix 2 Table 1.** Modeled Percent Weight Change by Time Point by whether Weight was Missing or Observed at each Follow-up Assessment<sup>a</sup>

|       | Modeled Mean (95% Confidence Interval) Percent Weight Change |                            |                            |                            |                            |                            |                            |                            |                            |                            |                            |                            |                            |                            |                            |                            |
|-------|--------------------------------------------------------------|----------------------------|----------------------------|----------------------------|----------------------------|----------------------------|----------------------------|----------------------------|----------------------------|----------------------------|----------------------------|----------------------------|----------------------------|----------------------------|----------------------------|----------------------------|
|       | 6 month                                                      |                            | Year 1                     |                            | Year 2                     |                            | Year 3                     |                            | Year 4                     |                            | Year 5                     |                            | Year 6                     |                            | Year 7 <sup>b</sup>        |                            |
|       | Missing (N=113)                                              | Observed (N=2231)          | Missing (N=144)            | Observed (N=2195)          | Missing (N=234)            | Observed (N=2098)          | Missing (N=267)            | Observed (N=2057)          | Missing (N=290)            | Observed (N=2029)          | Missing (N=312)            | Observed (N=1995)          | Missing (N=317)            | Observed (N=1969)          | Missing (N=977)            | Observed (N=1300)          |
| 6 mon |                                                              |                            | -21.9<br>(-23.7-<br>-20.1) | -23.1<br>(-24.1-<br>-22.2) | -23.2<br>(-24.7-<br>-21.7) | -23.1<br>(-24.0-<br>-22.1) | -23.3<br>(-24.6-<br>-21.9) | -23.1<br>(-24.0-<br>-22.1) | -22.9<br>(-24.3-<br>-21.6) | -23.1<br>(-24.0-<br>22.2)  | -23.2<br>(-24.5-<br>-21.9) | -23.1<br>(-24.0-<br>-22.1) | -22.9<br>(-24.2-<br>-21.7) | -23.1<br>(-24.0-<br>-22.2) | -22.5<br>(-23.5-<br>-21.6) | -23.5<br>(-24.4-<br>-22.5) |
| Y 1   | -30.3<br>(-32.8-<br>-27.8)                                   | -28.7<br>(-29.9-<br>-27.5) |                            |                            | -28.8<br>(-30.3-<br>-27.3) | -28.7<br>(-29.7-<br>-27.7) | -28.9<br>(-30.3-<br>-27.5) | -28.7<br>(-29.7-<br>-27.7) | -28.6<br>(-29.9-<br>-27.2) | -28.7<br>(-29.7-<br>27.8)  | -28.8<br>(-30.1-<br>-27.5) | -28.7<br>(-29.7-<br>-27.7) | -28.6<br>(-29.9-<br>-27.3) | -28.7<br>(-29.7-<br>-27.8) | -28.2<br>(-29.2-<br>-27.1) | -29.1<br>(-30.1-<br>-28.1) |
| Y 2   | -30.8<br>(-33.3-<br>-28.3)                                   | -29.2<br>(-30.4-<br>-28.0) | -28.0<br>(-29.9-<br>-26.2) | -29.3<br>(-30.3-<br>-28.2) |                            |                            | -29.4<br>(-30.8-<br>-27.9) | -29.2<br>(-30.2-<br>-28.2) | -29.0<br>(-30.4-<br>-27.7) | -29.2<br>(-30.2-<br>28.2)  | -29.3<br>(-30.6-<br>-28.0) | -29.2<br>(-30.2-<br>-28.2) | -29.1<br>(-30.4-<br>-27.8) | -29.2<br>(-30.2-<br>-28.2) | -28.7<br>(-29.7-<br>-27.6) | -29.6<br>(-30.6-<br>-28.6) |
| Y 3   | -29.0<br>(-31.6-<br>-26.5)                                   | -27.4<br>(-28.7-<br>-26.2) | -26.3<br>(-28.1-<br>-24.4) | -27.5<br>(-28.5-<br>-26.5) | -27.5<br>(-29.0-<br>-26.0) | -27.4<br>(-28.4-<br>-26.4) |                            |                            | -27.3<br>(-28.7-<br>-25.9) | -27.5<br>(-28.5-<br>26.5)  | -27.6<br>(-28.9-<br>-26.2) | -27.4<br>(28.4-<br>-26.4)  | -27.3<br>(-28.6-<br>-26.0) | -27.5<br>(-28.5-<br>-26.5) | -26.9<br>(-28.0-<br>-25.8) | -27.8<br>(-28.9-<br>-26.8) |
| Y 4   | -27.5<br>(-30.0-<br>-25.0)                                   | -25.9<br>(-27.1-<br>-24.7) | -24.8<br>(-26.6-<br>-22.9) | -26.0<br>(-27.0-<br>-25.0) | -26.0<br>(-27.5-<br>-24.5) | -25.9<br>(-26.9-<br>-24.9) | -26.1<br>(-27.5-<br>-24.7) | -25.9<br>(-26.9-<br>-24.9) |                            |                            | -26.0<br>(-27.4-<br>-24.7) | -25.9<br>(-26.9-<br>-24.9) | -25.8<br>(-27.1-<br>-24.5) | -26.0<br>(-26.9-<br>-25.0) | -25.4<br>(-26.5-<br>-24.3) | -26.3<br>(-27.4-<br>-25.3) |
| Y 5   | -26.8<br>(-29.3-<br>-24.2)                                   | -25.2<br>(-26.4-<br>-23.9) | -24.0<br>(-26.9-<br>-22.2) | -25.3<br>(-26.3-<br>-24.2) | -25.3<br>(-26.8-<br>-23.8) | -25.2<br>(-26.2-<br>-24.2) | -25.3<br>(-26.8-<br>-23.9) | -25.2<br>(-26.2-<br>-24.1) | -25.1<br>(-26.5-<br>-23.7) | -25.2<br>(-26.2-<br>24.2)  |                            |                            | -25.1<br>(-26.4-<br>-23.7) | -25.2<br>(-26.2-<br>-24.2) | -24.7<br>(-25.7-<br>-23.6) | -25.6<br>(-26.6-<br>-24.6) |
| Y 6   | -27.3<br>(-29.8-<br>-24.7)                                   | -25.7<br>(-26.9-<br>-24.4) | -24.5<br>(-26.4-<br>-22.7) | -25.8<br>(-26.8-<br>-24.7) | -25.8<br>(-27.3-<br>-24.3) | -25.7<br>(-26.7-<br>-24.7) | -25.8<br>(-27.3-<br>-24.4) | -25.6<br>(-26.7-<br>-24.6) | -25.6<br>(-27.0-<br>-24.2) | -25.7<br>(-26.7-<br>-24.7) | -25.8<br>(-27.2-<br>-24.5) | -25.7<br>(-26.7-<br>-24.7) |                            |                            | -25.2<br>(-26.3-<br>-24.1) | -26.1<br>(-27.2-<br>-25.1) |
| Y 7   | -25.8<br>(-28.4-<br>-23.3)                                   | -24.2<br>(-25.5-<br>-23.0) | -23.1<br>(-24.9-<br>-21.2) | -24.3<br>(-25.4-<br>-23.3) | -24.4<br>(-25.9-<br>-22.8) | -24.2<br>(-25.3-<br>-23.2) | -24.4<br>(-25.9-<br>-23.0) | -24.2<br>(-25.2-<br>-23.2) | -24.1<br>(-25.5-<br>-22.7) | -24.3<br>(-25.3-<br>-23.3) | -24.4<br>(-25.7-<br>-23.0) | -24.2<br>(-25.3-<br>-23.2) | -24.1<br>(-25.5-<br>-22.8) | -24.3<br>(-25.3-<br>-23.3) |                            |                            |

<sup>a</sup>A negative value indicates weight loss from baseline. Weight data was obtained in 95.3% (2231/2340) of participants at 6 months, 94.2% (2195/2329) at year-1, 90.8% (2098/2310) at year-2, 89.5%(2057/2299) at year-3, 88.4% (2029/2296) at year-4, 87.1% (1995/2293) at year-5 87.0% (1969/2267) at year-6, and 82.9% (1300/1569) at year-7. Missingness did not differ by surgical procedure so results for Roux-en-Y gastric bypass and laparoscopic adjustable gastric band were combined. <sup>b</sup>Data collection ended prior to 700 participants' 7 year assessment.

**eAppendix 2 Table 2.** Modeled Comorbid Condition Prevalence by Time Point by whether Comorbidity Status was Missing or Observed at each Follow-up Assessment<sup>a</sup>

| DM              | Modeled Prevalence (95% Confidence Interval) |                          |                         |                          |                     |                         |                     |                          |                         |                          |                         |                          |                     |                         |
|-----------------|----------------------------------------------|--------------------------|-------------------------|--------------------------|---------------------|-------------------------|---------------------|--------------------------|-------------------------|--------------------------|-------------------------|--------------------------|---------------------|-------------------------|
|                 | Baseline                                     |                          | Year 1                  |                          | Year 2              |                         | Year 3              |                          | Year 4                  |                          | Year 5                  |                          | Year 7 <sup>b</sup> |                         |
|                 | Missing (N=116)                              | Observed (N=2211)        | Missing (N=798)         | Observed (N=1529)        | Missin g (N)        | Observed (N=1286)       | Missin g (N)        | Observed (N=1294)        | Missing (N=1020)        | Observed (N=1307)        | Missing (N=970)         | Observed (N=1357)        | Missin g (N)        | Observed (N=886)        |
| BL              | NA                                           | NA                       | 27.6<br>(22.3-34.1)     | 28.3<br>(23.5-34.1)      | 28.3<br>(23.2-      | 27.8<br>(23.0-33.7)     | 28.2<br>(23.2-      | 28.2<br>(23.3-34.1)      | 28.9<br>(23.7-35.3)     | 27.7<br>(23.0-33.4)      | 28.4<br>(23.3-34.7)     | 28.2<br>(23.4-34.0)      | 24.1<br>(19.6-      | 29.5<br>(24.4-35.7)     |
| Y 1             | 8.2<br>(6.1-10.9)                            | 9.3<br>(5.7-15.1)        | NA                      | NA                       | 11.2<br>(9.0-       | 11.1<br>(9.0-13.7)      | 11.1<br>(9.0-       | 11.1<br>(9.0-13.7)       | 11.4<br>(9.2-14.2)      | 10.9<br>(8.9-13.5)       | 11.2<br>(9.0-13.9)      | 11.1<br>(9.0-13.7)       | 9.5<br>(7.6-        | 11.6<br>(9.4-14.4)      |
| Y 2             | 7.7<br>(5.8-10.2)                            | 8.7<br>(5.4-14.2)        | 10.3<br>(8.1-13.0)      | 10.5<br>(8.5-13.1)       | NA                  | NA                      | 10.6<br>(8.5-       | 10.6<br>(8.5-13.1)       | 10.9<br>(8.7-13.6)      | 10.4<br>(8.4-12.9)       | 10.6<br>(8.5-13.3)      | 10.5<br>(8.5-13.0)       | 8.9<br>(7.1-        | 10.9<br>(8.8-13.6)      |
| Y 3             | 8.4<br>(6.3-11.2)                            | 9.6<br>(5.9-15.6)        | 11.3<br>(9.0-14.3)      | 11.6<br>(9.4-14.4)       | 11.8<br>(9.5-       | 11.6<br>(9.4-14.4)      | NA                  | NA                       | 12.1<br>(9.7-15.1)      | 11.6<br>(9.4-14.3)       | 11.8<br>(9.5-14.8)      | 11.7<br>(9.5-14.5)       | 9.9<br>(7.9-        | 12.1<br>(9.8-15.0)      |
| Y 4             | 9.2<br>(6.9-12.3)                            | 10.5<br>(6.5-17.1)       | 12.1<br>(9.6-15.2)      | 12.4<br>(10.0-15.3)      | 12.6<br>(10.1-      | 12.4<br>(10.0-15.4)     | 12.6<br>(10.1-      | 12.5<br>(10.2-15.5)      | NA                      | NA                       | 12.7<br>(10.2-15.8)     | 12.6<br>(10.2-15.6)      | 10.6<br>(8.5-       | 13.0<br>(10.5-16.1)     |
| Y 5             | 9.8<br>(7.4-13.0)                            | 11.1<br>(6.9-18.2)       | 13.0<br>(10.4-16.4)     | 13.4<br>(10.9-16.4)      | 13.6<br>(10.9-      | 13.4<br>(10.8-16.5)     | 13.6<br>(10.9-      | 13.5<br>(11.0-16.7)      | 14.0<br>(11.3-17.4)     | 13.4<br>(10.9-16.5)      | NA                      | NA                       | 11.5<br>(9.2-       | 14.0<br>(11.4-17.3)     |
| Y 7             | 11.0<br>(8.3-14.7)                           | 12.5<br>(7.7-20.5)       | 14.1<br>(11.1-17.9)     | 14.5<br>(11.7-17.9)      | 14.7<br>(11.7-      | 14.4<br>(11.6-18.0)     | 14.5<br>(11.6-      | 14.5<br>(11.7-18.1)      | 14.9<br>(11.9-18.8)     | 14.3<br>(11.6-17.8)      | 14.7<br>(11.7-18.5)     | 14.6<br>(11.8-18.1)      | NA                  | NA                      |
| <b>High LDL</b> | <b>Missing (N=340)</b>                       | <b>Observed (N=1884)</b> | <b>Missing (N=1045)</b> | <b>Observed (N=1179)</b> | <b>Missin g (N)</b> | <b>Observed (N=987)</b> | <b>Missin g (N)</b> | <b>Observed (N=1007)</b> | <b>Missing (N=1216)</b> | <b>Observed (N=1008)</b> | <b>Missing (N=1180)</b> | <b>Observed (N=1044)</b> | <b>Missin g (N)</b> | <b>Observed (N=678)</b> |
| BL              | NA                                           | NA                       | 30.1<br>(25.0-36.2)     | 38.0<br>(32.1-45.0)      | 31.3<br>(26.3-      | 38.8<br>(32.8-45.9)     | 30.6<br>(25.6-      | 39.8<br>(33.8-47.0)      | 31.4<br>(26.3-37.4)     | 38.8<br>(32.9-45.8)      | 32.0<br>(26.8-38.2)     | 37.5<br>(31.7-44.4)      | 35.1<br>(29.7-      | 31.2<br>(25.9-37.6)     |
| Y 1             | 15.3<br>(11.2-20.8)                          | 16.9<br>(13.3-21.5)      | NA                      | NA                       | 17.2<br>(14.2-      | 21.3<br>(17.8-25.7)     | 16.8<br>(13.8-      | 21.9<br>(18.2-26.3)      | 17.3<br>(14.2-21)       | 21.3<br>(17.8-25.6)      | 17.6<br>(14.5-21.4)     | 20.6<br>(17.1-24.8)      | 19.3<br>(16.0-      | 17.1<br>(14-20.9)       |
| Y 2             | 14.9<br>(11.0-20.3)                          | 16.5<br>(13.0-21.0)      | 16.0<br>(13.1-19.6)     | 20.2<br>(16.7-24.4)      | NA                  | NA                      | 16.4<br>(13.4-      | 21.3<br>(17.7-25.7)      | 16.8<br>(13.9-20.5)     | 20.8<br>(17.3-25.1)      | 17.1<br>(14.1-20.9)     | 20.1<br>(16.7-24.2)      | 19.0<br>(15.7-      | 16.9<br>(13.8-20.6)     |
| Y 3             | 15.7<br>(11.6-21.3)                          | 17.3<br>(13.7-22.1)      | 16.7<br>(13.7-20.5)     | 21.2<br>(17.5-25.5)      | 17.6<br>(14.5-      | 21.8<br>(18.1-26.2)     | NA                  | NA                       | 17.6<br>(14.5-21.4)     | 21.7<br>(18.1-26.1)      | 18.0<br>(14.8-21.8)     | 21.0<br>(17.5-25.4)      | 19.9<br>(16.5-      | 17.6<br>(14.5-21.6)     |
| Y 4             | 16.5<br>(12.2-22.3)                          | 18.2<br>(14.3-23.2)      | 17.3<br>(14.2-21.2)     | 21.9<br>(18.2-26.4)      | 18.3<br>(15.1-      | 22.6<br>(18.8-27.3)     | 17.8<br>(14.6-      | 23.1<br>(19.3-27.8)      | NA                      | NA                       | 18.6<br>(15.3-22.7)     | 21.8<br>(18.1-26.3)      | 20.8<br>(17.2-      | 18.4<br>(15.1-22.5)     |
| Y 5             | 16.4<br>(12.1-22.2)                          | 18.1<br>(14.3-23.1)      | 17.2<br>(14.1-21.1)     | 21.8<br>(18.1-26.3)      | 18.1<br>(14.9-      | 22.4<br>(18.6-26.9)     | 17.6<br>(14.4-      | 22.9<br>(19.1-27.5)      | 18.1<br>(14.9-22.0)     | 22.3<br>(18.6-26.8)      | NA                      | NA                       | 20.6<br>(17.0-      | 18.3<br>(15.0-22.3)     |
| Y 7             | 16.3<br>(12.0-22.4)                          | 18.1<br>(14.1-23.2)      | 16.7<br>(13.5-20.8)     | 21.1<br>(17.3-25.8)      | 17.6<br>(14.3-      | 21.8<br>(17.9-26.6)     | 17.2<br>(13.9-      | 22.4<br>(18.4-27.3)      | 17.6<br>(14.3-21.7)     | 21.8<br>(17.9-26.5)      | 18.0<br>(14.6-22.2)     | 21.0<br>(17.2-25.7)      | NA                  | NA                      |

*Continued next page*

**eAppendix 2 Table 2 Continued.**

| High TG        | Modeled Prevalence (95% Confidence Interval) |                          |                         |                          |                         |                          |                         |                          |                         |                          |                         |                          |                         |                         |
|----------------|----------------------------------------------|--------------------------|-------------------------|--------------------------|-------------------------|--------------------------|-------------------------|--------------------------|-------------------------|--------------------------|-------------------------|--------------------------|-------------------------|-------------------------|
|                | Baseline                                     |                          | Year 1                  |                          | Year 2                  |                          | Year 3                  |                          | Year 4                  |                          | Year 5                  |                          | Year 7 <sup>b</sup>     |                         |
|                | Missing (N =318)                             | Observed (N=1906)        | Missing (N =971)        | Observed (N=1253)        | Missing (N =1153)       | Observed (N=1071)        | Missing (N =1132)       | Observed (N=1092)        | Missing (N =1153)       | Observed (N=1071)        | Missing (N =1132)       | Observed (N=1092)        | Missing (N =1511)       | Observed (N=713)        |
| BL             | NA                                           | NA                       | 21.4 (16.7-27.5)        | 21.0 (16.7-26.4)         | 21.1 (16.6-26.9)        | 21.4 (17.1-27.0)         | 21.0 (16.5-26.9)        | 22.0 (17.5-27.7)         | 21.3 (16.7-27.1)        | 21.9 (17.4-27.7)         | 21.4 (16.8-27.3)        | 21.0 (16.6-26.6)         | 21.1 (16.7-26.7)        | 20.7 (16.1-26.5)        |
| Y 1            | 3.3 (2.0-5.6)                                | 3.4 (2.3-5.3)            | NA                      | NA                       | 4.2 (3.0-5.9)           | 4.3 (3.1-5.9)            | 4.1 (3.0-5.8)           | 4.3 (3.1-6.0)            | 4.2 (3.0-5.9)           | 4.4 (3.2-6.0)            | 4.2 (3.0-5.9)           | 4.2 (3.0-5.7)            | 4.2 (3.0-5.8)           | 4.1 (3.0-5.6)           |
| Y 2            | 3.6 (2.1-6.2)                                | 3.8 (2.5-5.8)            | 4.8 (3.5-6.8)           | 4.7 (3.4-6.5)            | NA                      | NA                       | 4.7 (3.4-6.6)           | 4.9 (3.6-6.8)            | 4.8 (3.5-6.7)           | 5.0 (3.6-6.8)            | 4.8 (3.5-6.7)           | 4.8 (3.5-6.5)            | 4.7 (3.4-6.5)           | 4.6 (3.3-6.4)           |
| Y 3            | 5.0 (3.0-8.3)                                | 5.2 (3.5-7.7)            | 6.4 (4.7-8.8)           | 6.3 (4.7-8.5)            | 6.4 (4.8-8.7)           | 6.6 (4.9-8.8)            | NA                      | NA                       | 6.4 (4.7-8.7)           | 6.6 (5.0-8.9)            | 6.5 (4.8-8.9)           | 6.4 (4.8-8.5)            | 6.3 (4.7-8.5)           | 6.2 (4.6-8.4)           |
| Y 4            | 4.4 (2.7-7.3)                                | 4.6 (3.1-7.0)            | 5.6 (4.1-7.7)           | 5.5 (4.1-7.5)            | 5.6 (4.1-7.7)           | 5.7 (4.2-7.7)            | 5.6 (4.1-7.7)           | 5.8 (4.3-7.9)            | NA                      | NA                       | 5.7 (4.2-7.8)           | 5.6 (4.1-7.6)            | 5.5 (4.1-7.5)           | 5.4 (3.9-7.4)           |
| Y 5            | 4.2 (2.5-7.0)                                | 4.4 (2.9-6.6)            | 5.3 (3.8-7.4)           | 5.2 (3.8-7.1)            | 5.3 (3.9-7.3)           | 5.4 (4.0-7.4)            | 5.3 (3.8-7.3)           | 5.5 (4.0-7.5)            | 5.4 (3.9-7.4)           | 5.5 (4.1-7.5)            | NA                      | NA                       | 5.2 (3.8-7.2)           | 5.1 (3.7-7.1)           |
| Y 7            | 4.0 (2.7-8.0)                                | 4.8 (3.1-7.5)            | 5.6 (3.9-8.1)           | 5.5 (3.9-7.8)            | 5.7 (4.0-8.0)           | 5.7 (4.1-8.2)            | 5.6 (3.9-8.0)           | 5.9 (4.1-8.3)            | 5.7 (4.0-8.1)           | 5.9 (4.2-8.2)            | 5.8 (4.0-8.3)           | 5.7 (4.0-8.0)            | NA                      | NA                      |
| <b>Low HDL</b> | <b>Missing (N =81)</b>                       | <b>Observed (N=2249)</b> | <b>Missing (N =698)</b> | <b>Observed (N=1632)</b> | <b>Missing (N =928)</b> | <b>Observed (N=1602)</b> | <b>Missing (N =943)</b> | <b>Observed (N=1387)</b> | <b>Missing (N =984)</b> | <b>Observed (N=1346)</b> | <b>Missing (N =927)</b> | <b>Observed (N=1403)</b> | <b>Missing (N =904)</b> | <b>Observed (N=904)</b> |
| BL             | NA                                           | NA                       | 36.4 (30.0-44.3)        | 33.2 (27.9-39.6)         | 39.1 (32.6-46.9)        | 30.6 (25.6-36.5)         | 39.7 (33.2-47.6)        | 30.0 (25.1-35.9)         | 36.5 (30.4-43.8)        | 32.2 (27.1-38.4)         | 37.9 (31.6-45.5)        | 31.5 (26.4-37.6)         | 36.2 (30.4-43.2)        | 29.0 (23.9-35.1)        |
| Y 1            | 5.3 (2.7-10.5)                               | 8.7 (6.5-11.8)           | NA                      | NA                       | 13.1 (10.5-16.2)        | 10.2 (8.3-12.6)          | 13.2 (10.7-16.3)        | 10.0 (8.1-12.3)          | 12.0 (9.7-14.8)         | 10.6 (8.6-13.0)          | 12.5 (10.1-15.5)        | 10.4 (8.4-12.8)          | 11.9 (9.6-14.6)         | 9.5 (7.6-11.8)          |
| Y 2            | 3.3 (1.7-6.6)                                | 5.5 (4.0-7.5)            | 7.5 (5.8-9.7)           | 6.9 (5.4-8.7)            | NA                      | NA                       | 8.5 (6.6-10.8)          | 6.4 (5.0-8.1)            | 7.6 (5.9-9.7)           | 6.7 (5.3-8.5)            | 7.9 (6.2-10.1)          | 6.6 (5.2-8.4)            | 7.5 (5.9-9.6)           | 6.0 (4.7-7.7)           |
| Y 3            | 3.4 (1.7-6.8)                                | 5.6 (4.1-7.6)            | 7.7 (5.9-9.9)           | 7.0 (5.5-8.9)            | 8.6 (6.7-11.0)          | 6.7 (5.3-8.5)            | NA                      | NA                       | 7.8 (6.1-9.9)           | 6.9 (5.4-8.7)            | 8.1 (6.4-10.4)          | 6.8 (5.3-8.6)            | 7.7 (6.0-9.8)           | 6.1 (4.8-7.9)           |
| Y 4            | 4.0 (2.0-7.8)                                | 6.5 (4.8-8.8)            | 9.2 (7.2-11.8)          | 8.4 (6.7-10.6)           | 10.2 (8.1-12.9)         | 8.0 (6.4-10.0)           | 10.5 (8.3-13.3)         | 7.9 (6.3-9.9)            | NA                      | NA                       | 9.8 (7.8-12.4)          | 8.1 (6.5-10.2)           | 9.2 (7.3-11.6)          | 7.4 (5.8-9.4)           |
| Y 5            | 4.5 (2.2-9.0)                                | 7.4 (5.4-10.0)           | 10.4 (8.2-13.2)         | 9.5 (7.6-11.8)           | 11.5 (9.2-14.4)         | 9.0 (7.2-11.2)           | 11.8 (9.4-14.8)         | 8.9 (7.1-11.1)           | 10.5 (8.4-13.2)         | 9.3 (7.5-11.6)           | NA                      | NA                       | 10.5 (8.4-13.1)         | 8.4 (6.7-10.5)          |
| Y 7            | 3.8 (1.9-7.6)                                | 6.2 (4.4-8.6)            | 8.2 (6.2-10.9)          | 7.5 (5.7-9.7)            | 9.0 (6.9-11.8)          | 7.1 (5.4-9.2)            | 9.1 (6.9-11.9)          | 6.9 (5.3-9.0)            | 8.3 (6.3-10.8)          | 7.3 (5.6-9.5)            | 8.6 (6.6-11.3)          | 7.2 (5.5-9.4)            | NA                      | NA                      |

**Continued next page**

**eAppendix 2 Table 2 Continued.**

| HTN | Modeled Prevalence (95% Confidence Interval) |                     |                     |                     |                     |                     |                     |                     |                     |                     |                     |                     |                     |                     |
|-----|----------------------------------------------|---------------------|---------------------|---------------------|---------------------|---------------------|---------------------|---------------------|---------------------|---------------------|---------------------|---------------------|---------------------|---------------------|
|     | Baseline                                     |                     | Year 1              |                     | Year 2              |                     | Year 3              |                     | Year 4              |                     | Year 5              |                     | Year 7 <sup>b</sup> |                     |
|     | Missing (N=74)                               | Observed (N=2263)   | Missing (N=424)     | Observed (N=1913)   | Missing (N=737)     | Observed (N=1600)   | Missing (N=793)     | Observed (N=1544)   | Missing (N=804)     | Observed (N=1533)   | Missing (N=752)     | Observed (N=1585)   | Missing (N=1316)    | Observed (N=1021)   |
| BL  | NA                                           | NA                  | 65.4<br>(59.0-72.5) | 67.9<br>(62.8-73.5) | 66.7<br>(61.0-72.9) | 67.9<br>(62.6-73.5) | 67.0<br>(61.3-73.2) | 67.7<br>(62.5-73.4) | 63.6<br>(58.1-69.7) | 69.5<br>(64.1-75.3) | 64.9<br>(59.2-71.2) | 68.7<br>(63.4-74.4) | 66.9<br>(61.5-72.9) | 65.5<br>(59.9-71.7) |
| Y 1 | 52.2<br>(43.3-63.0)                          | 42.4<br>(38.3-47.0) | NA                  | NA                  | 43.7<br>(39.6-48.1) | 44.4<br>(40.7-48.5) | 43.8<br>(39.8-48.2) | 44.2<br>(40.5-48.3) | 41.4<br>(37.5-45.8) | 45.2<br>(41.4-49.4) | 42.3<br>(38.3-46.8) | 44.7<br>(41.0-48.9) | 43.5<br>(39.6-47.8) | 42.6<br>(38.6-46.9) |
| Y 2 | 52.3<br>(43.3-63.2)                          | 42.5<br>(38.3-47.2) | 43.1<br>(38.5-48.3) | 44.8<br>(41.0-49.0) | NA                  | NA                  | 44.3<br>(40.1-48.9) | 44.7<br>(40.9-49.0) | 41.7<br>(37.7-46.2) | 45.6<br>(41.7-49.9) | 42.7<br>(38.6-47.3) | 45.2<br>(41.3-49.4) | 43.7<br>(39.8-48.1) | 42.8<br>(38.8-47.2) |
| Y 3 | 56.1<br>(46.5-67.8)                          | 45.6<br>(41.2-50.6) | 46.3<br>(41.4-51.7) | 48.1<br>(44.1-52.5) | 47.5<br>(43.0-52.4) | 48.3<br>(44.2-52.8) | NA                  | NA                  | 44.9<br>(40.6-49.6) | 49.0<br>(44.9-53.5) | 45.9<br>(41.5-50.9) | 48.6<br>(44.5-53.1) | 47.0<br>(42.8-51.6) | 46.0<br>(41.7-50.6) |
| Y 4 | 60.4<br>(50.1-72.8)                          | 49.1<br>(44.4-54.4) | 49.9<br>(44.7-55.7) | 51.9<br>(47.6-56.5) | 51.2<br>(46.5-56.4) | 52.1<br>(47.8-56.8) | 51.5<br>(46.8-56.7) | 52.0<br>(47.7-56.7) | NA                  | NA                  | 49.7<br>(45.0-55.0) | 52.6<br>(48.3-57.3) | 50.6<br>(46.1-55.5) | 49.5<br>(45.0-54.4) |
| Y 5 | 61.1<br>(50.7-73.8)                          | 49.7<br>(44.9-55.0) | 50.4<br>(45.1-56.2) | 52.3<br>(48.1-57.0) | 51.6<br>(46.8-56.8) | 52.5<br>(48.2-57.2) | 51.8<br>(47.1-57.1) | 52.4<br>(48.1-57.1) | 48.9<br>(44.3-54.1) | 53.4<br>(49-58.2)   | NA                  | NA                  | 51.1<br>(46.6-56.1) | 50.0<br>(45.5-55.0) |
| Y 7 | 66.0<br>(54.6-79.8)                          | 53.7<br>(48.4-59.6) | 54.0<br>(48.2-60.5) | 56.1<br>(51.3-61.4) | 55.3<br>(50.0-61.1) | 56.3<br>(51.4-61.6) | 55.5<br>(50.3-61.4) | 56.1<br>(51.3-61.5) | 52.6<br>(47.5-58.4) | 57.5<br>(52.5-62.9) | 53.9<br>(48.6-59.9) | 57.1<br>(52.2-62.5) | NA                  | NA                  |

Abbreviations: DM, diabetes mellitus; HDL, high-density lipoprotein; HTN, hypertension; LDL, low-density lipoprotein; NA, not applicable; TG, Triglyceride;

<sup>a</sup>Diabetes was obtained in 65.7% (1529/2326) of participants at year-1, 55.7% (1286/2309) at year-2, 56.4% (1294/2293) at year-3, 57.0% (1307/2292) at year-4, 59.4% (1357/2286) at year-5 and 56.8% (886/1559) at year-7. High LDL was obtained in 50.7% (1179/2326) of participants at year-1, 42.7% (987/2309) at year-2, 43.9% (1007/2293) at year-3, 44.0% (1008/2292) at year-4, 45.7% (1044/2286) at year-5, and 43.5% (678/1559) at year-7. High triglycerides was obtained in 53.9% (1253/2326) of participants at year-1, 46.4% (1071/2309) at year-2, 47.6% (1092/2293) at year-3, 46.7% (1071/2292) at year-4, 47.8% (1092/2286) at year-5, and 45.7% (713/1559) at year-7. Low HDL was obtained in 70.2% (1632/2326) of participants at year-1, 60.7% (1402/2309) at year-2, 60.5% (1387/2293) at year-3, 58.7% (1346/2292) at year-4, 61.4% (1403/2286) at year-5, and 58.0% (904/1559) at year-7. Hypertension was obtained 82.2% (1913/2326) of participants at year-1, 69.3% (1600/2309) at year-2, 67.3% (1544/2293) at year-3, 66.9% (1533/2292) at year-4, 69.3% (1585/2286) at year-5, and 65.5% (1021/1559) at year-7.

<sup>b</sup>Data collection ended prior to 700 participants' 7 year assessment.



**eFigure 1. Flow of Participants through Recruitment, Follow-up, and Weight Measurements**

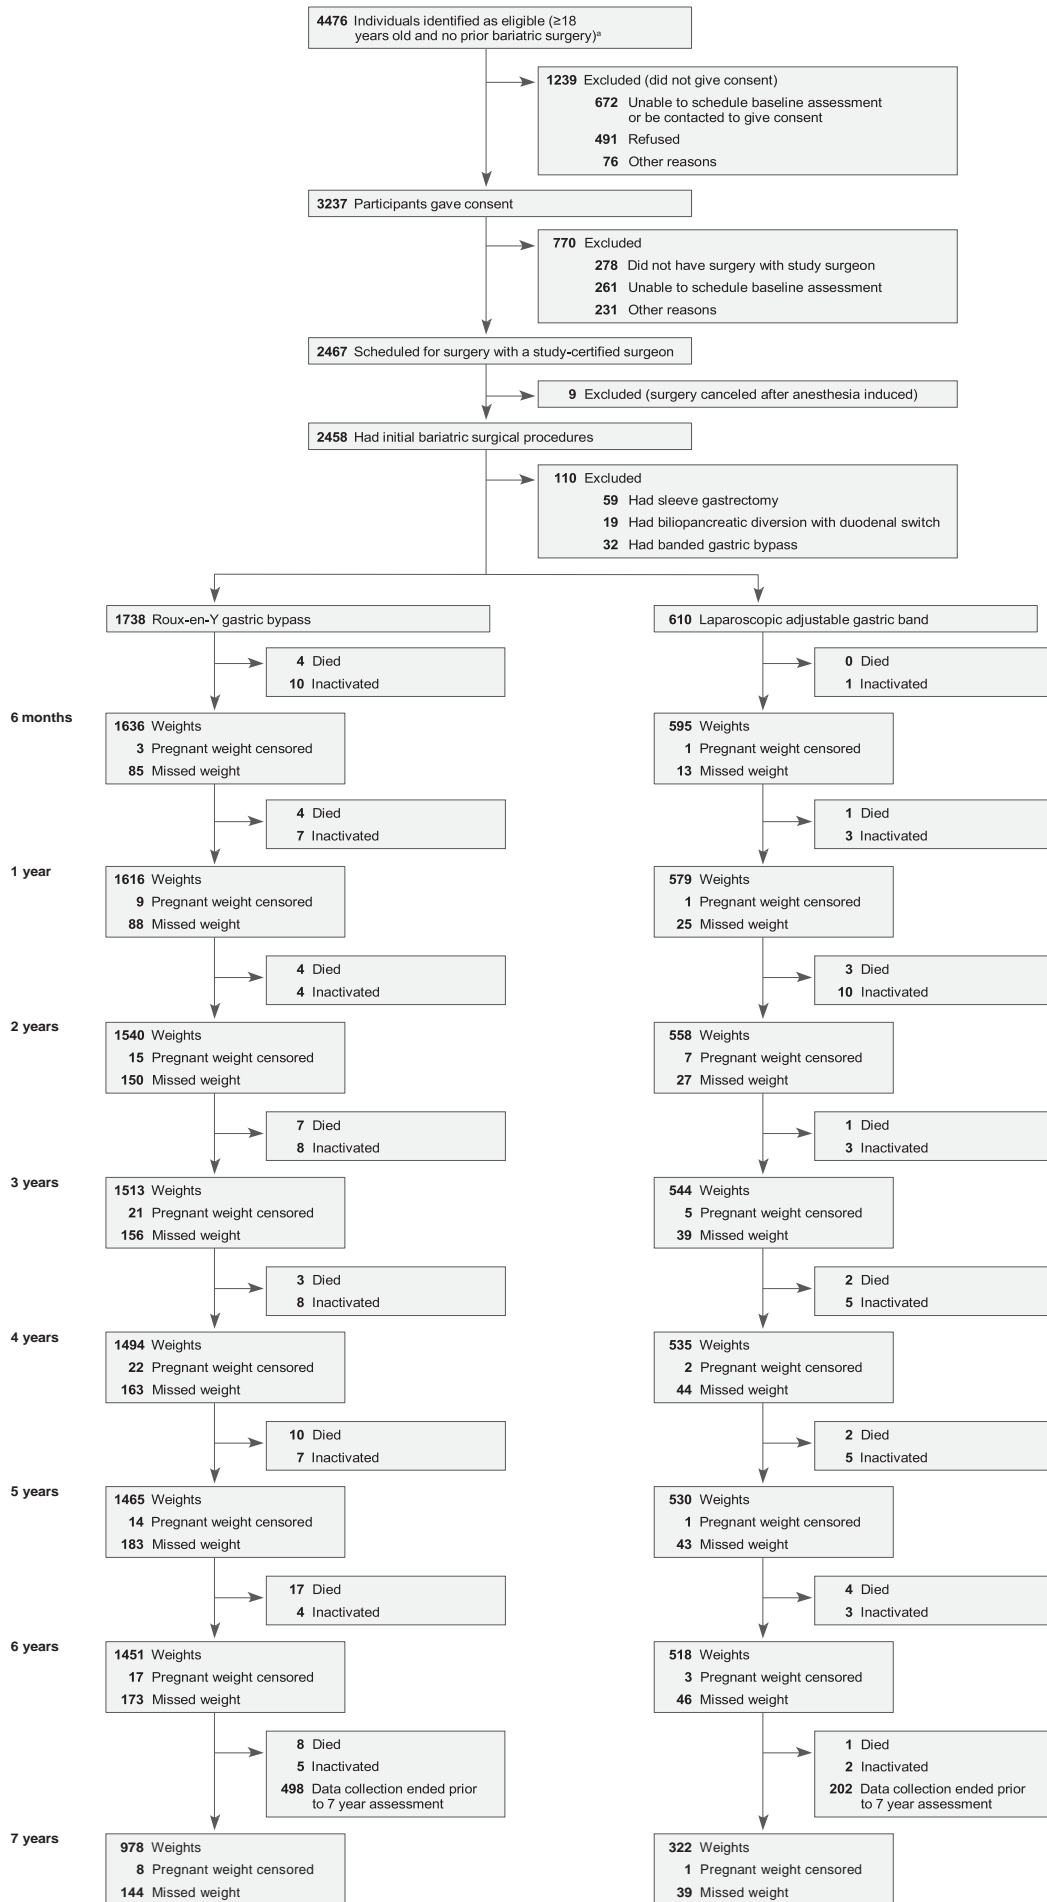

\*The number of patients screened to identify those thought to be eligible was not recorded.

**eFigure 2. Incidence of Comorbid Conditions Following Bariatric Surgery**

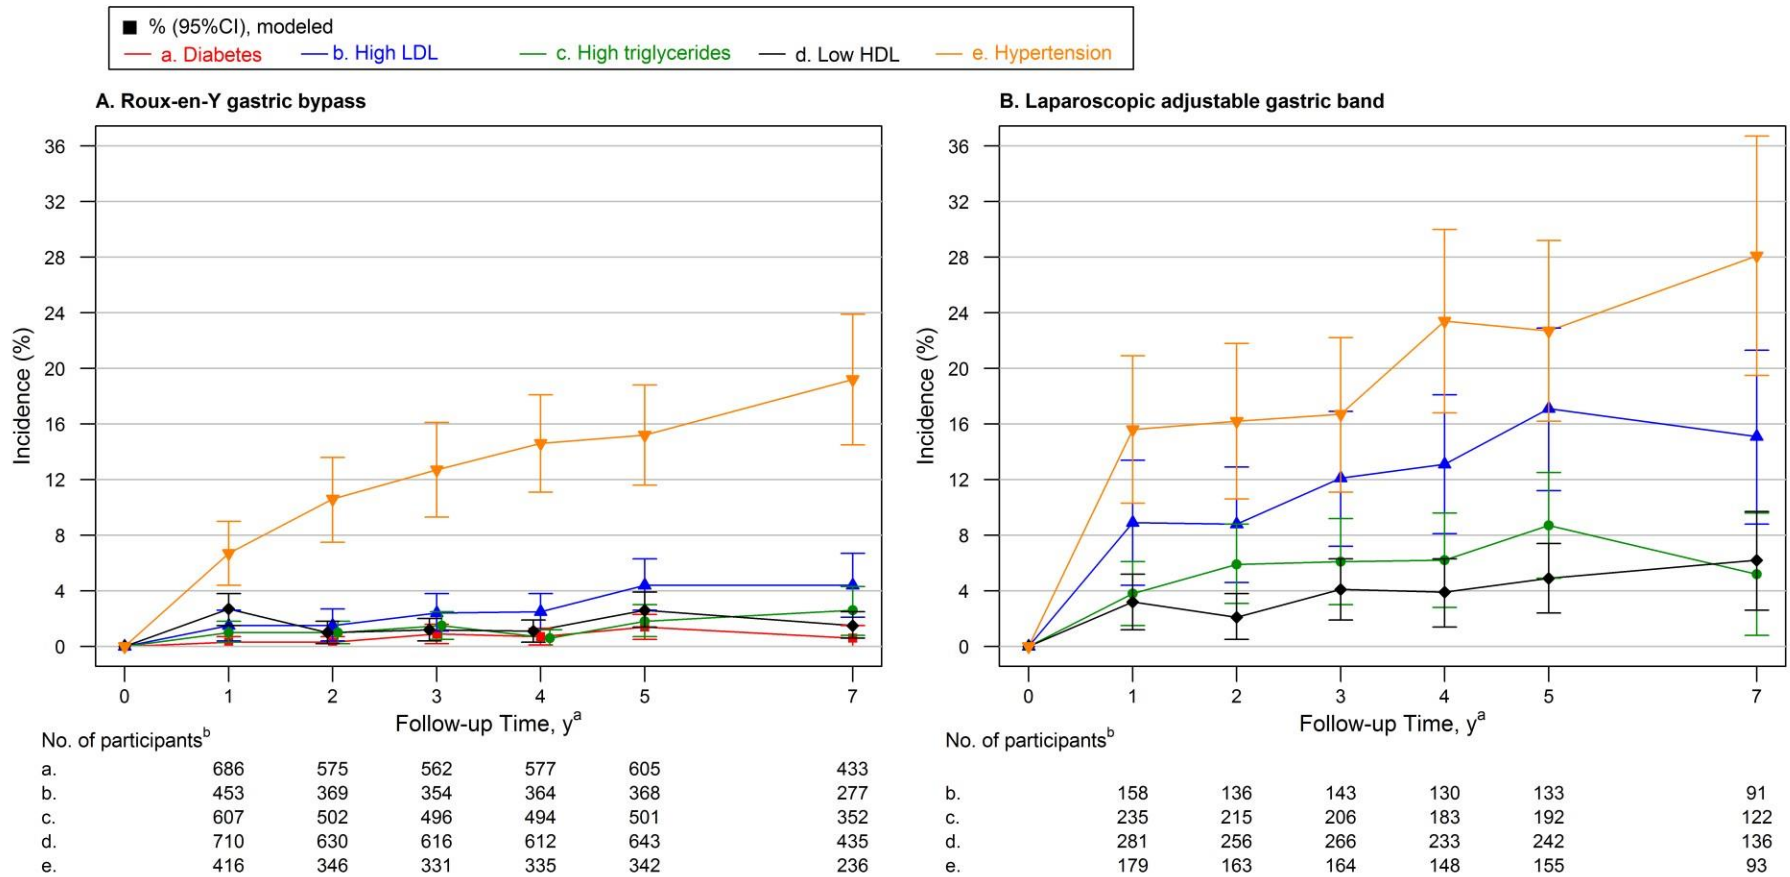

Abbreviations: HDL, high-density lipoprotein cholesterol; LAGB, laparoscopic adjustable gastric band; LDL, low-density lipoprotein cholesterol; RYGB, Roux-en-Y gastric bypass.

Lines indicate modeled incidence, bars, 95% CI, based on mixed models, adjusted for baseline factors independently related to missing follow-up data (i.e., site, age and smoking). Observed and modeled data are reported in **eTable 3** and **eTable 4**, respectively (supplemental material). Incidence was defined as the percentage of participants who had the comorbidity at the indicated follow-up among participants who did not have the comorbidity at baseline.

<sup>a</sup>Comorbidities were not assessed at 6 months or year 6. <sup>b</sup>Data collection ended before the 7 year assessment of 30% of LABS-2 participants. Given the sample size, diabetes incidence was too rare to model following LAGB.

**eTable 1.** Baseline Characteristics of LABS-2 Participants

|                                                       | <b>Roux-en-Y<br/>Gastric Bypass</b><br>(n = 1738 <sup>a</sup> ) | <b>Laparoscopic<br/>Adjustable Gastric Band</b><br>(n = 610 <sup>a</sup> ) |
|-------------------------------------------------------|-----------------------------------------------------------------|----------------------------------------------------------------------------|
| <b>Age (years)</b>                                    |                                                                 |                                                                            |
| Median (25 <sup>th</sup> -75 <sup>th</sup> )          | 45 (37-54)                                                      | 48 (37-56)                                                                 |
| Range                                                 | 19 to 75                                                        | 18 to 78                                                                   |
| <b>Sex - n (%)</b>                                    |                                                                 |                                                                            |
| Female                                                | 1389 (79.9)                                                     | 465 (76.2)                                                                 |
| Male                                                  | 349 (20.1)                                                      | 145 (23.8)                                                                 |
| <b>Race - n (%)</b>                                   | N=1720                                                          | N=606                                                                      |
| White                                                 | 1463 (85.1)                                                     | 543 (89.6)                                                                 |
| Black                                                 | 196 (11.4)                                                      | 51 (8.4)                                                                   |
| Other                                                 | 61 (3.5)                                                        | 12 (2.0)                                                                   |
| <b>Ethnicity - n (%)</b>                              | N=1737                                                          | N=609                                                                      |
| Hispanic                                              | 85 (4.9)                                                        | 26 (4.3)                                                                   |
| Non-Hispanic                                          | 1652 (95.1)                                                     | 583 (95.7)                                                                 |
| <b>Smoker- n (%)</b>                                  | N=1734                                                          | N=610                                                                      |
| Yes                                                   | 250 (14.4)                                                      | 56 (9.2)                                                                   |
| No                                                    | 1484 (85.6)                                                     | 554 (90.8)                                                                 |
| <b>Weight (kg)</b>                                    |                                                                 |                                                                            |
| Median (25 <sup>th</sup> -75 <sup>th</sup> )          | 130 (116-150)                                                   | 123 (111- 139)                                                             |
| Range                                                 | 75 to 240                                                       | 85 to 246                                                                  |
| <b>Body mass index (kg/m<sup>2</sup>)<sup>b</sup></b> |                                                                 |                                                                            |
| Median (25 <sup>th</sup> -75 <sup>th</sup> )          | 46.6 (42.4, 51.9)                                               | 43.9 (40.4, 48.0)                                                          |
| Range                                                 | 33.7 to 81.0                                                    | 33.0 to 87.3                                                               |
| <b>Comorbidities - No./Total (%)</b>                  |                                                                 |                                                                            |
| Diabetes                                              | 583/1646 (35.4)                                                 | 164/569 (28.8)                                                             |
| High LDL                                              | 515/1406 (36.6)                                                 | 177/482 (36.7)                                                             |
| High triglycerides                                    | 340/1426 (23.8)                                                 | 103/489 (21.1)                                                             |
| Low HDL                                               | 648/1671 (38.8)                                                 | 194/582 (33.3)                                                             |
| Hypertension                                          | 1159/1682 (68.9)                                                | 367/585 (62.7)                                                             |

Abbreviations: HDL, high-density lipoprotein cholesterol; LDL, low-density lipoprotein cholesterol.

<sup>a</sup>Denominators shift between variables because of missing data.

<sup>b</sup>Calculated as weight in kilograms divided by height in meters squared.

**eTable 2.** Observed and Modeled Weight Change,<sup>a</sup> by Time Point in Relation to Bariatric Surgery

|                                                                    | 6 months              | Year 1                | Year 2                | Year 3                | Year 4                | Year 5                | Year 6                | Year 7 <sup>b</sup>   |                          |        |           |
|--------------------------------------------------------------------|-----------------------|-----------------------|-----------------------|-----------------------|-----------------------|-----------------------|-----------------------|-----------------------|--------------------------|--------|-----------|
| Observed, N, Median (25 <sup>th</sup> -75 <sup>th</sup> )          |                       |                       |                       |                       |                       |                       |                       |                       |                          |        |           |
| <b>RYGB</b>                                                        | N=1636                | N=1616                | N=1540                | N=1513                | N=1494                | N=1465                | N=1451                | N=978                 |                          |        |           |
| Percent Weight Change                                              | -27.0<br>(-30.8-23.0) | -34.0<br>(-39.2-28.6) | -34.1<br>(-40.4-27.6) | -31.5<br>(-38.4-24.7) | -29.5<br>(-37.0-22.7) | -28.8<br>(-36.0-21.6) | -29.1<br>(-36.4-21.7) | -27.6<br>(-35.1-20.1) |                          |        |           |
| Weight Change, kg                                                  | -35.0<br>(-41.4-29.5) | -44.5<br>(-53.6-35.9) | -43.6<br>(-55.5-35.0) | -40.5<br>(-51.8-31.4) | -37.7<br>(-49.5-28.6) | -37.3<br>(-48.2-27.3) | -37.3<br>(-49.1-27.7) | -35.5<br>(-47.3-25.9) |                          |        |           |
| <b>LAGB</b>                                                        | N=595                 | N=579                 | N=558                 | N=544                 | N=535                 | N=530                 | N=518                 | N=322                 |                          |        |           |
| Percent Weight Change                                              | -11.7<br>(-15.5-8.1)  | -13.9<br>(-19.6-9.6)  | -16.2<br>(-22.9-9.3)  | -16.0<br>(-23.0-7.9)  | -14.7<br>(-22.9-6.7)  | -15.0<br>(-22.5-6.8)  | -16.1<br>(-24.3-7.6)  | -14.4<br>(-23.1-6.9)  |                          |        |           |
| Weight Change, kg                                                  | -14.5<br>(-19.5-10.5) | -17.7<br>(-24.5-11.8) | -20.0<br>(-28.2-10.9) | -20.2<br>(-29.1-9.5)  | -17.7<br>(-28.2-8.6)  | -18.2<br>(-28.2-8.6)  | -19.5<br>(-29.1-9.1)  | -17.7<br>(-28.2-9.1)  |                          |        |           |
| Model-based Estimates, Mean (95% Confidence Interval) <sup>c</sup> |                       |                       |                       |                       |                       |                       |                       |                       |                          |        |           |
|                                                                    |                       |                       |                       |                       |                       |                       |                       |                       | P for trend<br>Years 3-7 |        |           |
| <b>RYGB (N= 1734)</b>                                              |                       |                       |                       |                       |                       |                       |                       |                       |                          | linear | quadratic |
| Percent Weight Change                                              | -27.7<br>(-28.4-27.1) | -34.5<br>(-35.1-33.8) | -34.6<br>(-35.4-33.9) | -32.3<br>(-33.0-31.5) | -30.5<br>(-31.2-29.7) | -29.6<br>(-30.4-28.8) | -29.9<br>(-30.7-29.2) | -28.4<br>(-29.2-27.6) | <.001                    | <.01   |           |
| Weight Change, kg                                                  | -37.0<br>(-38.1-36.0) | -46.2<br>(-47.4-45.1) | -46.6<br>(-47.8-45.4) | -43.4<br>(-44.6-42.2) | -41.0<br>(-42.2-39.7) | -39.8<br>(-41.0-38.5) | -40.3<br>(-41.5-39.0) | -38.2<br>(-39.5-36.9) | <.001                    | <.01   |           |
| <b>LAGB (N=610)</b>                                                |                       |                       |                       |                       |                       |                       |                       |                       |                          |        |           |
| Percent Weight Change                                              | -12.5<br>(-14.0-11.0) | -15.0<br>(-16.6-13.5) | -16.4<br>(-18.0-14.7) | -16.3<br>(-18.0-14.6) | -15.5<br>(-17.2-13.8) | -15.2<br>(-17.0-13.5) | -16.2<br>(-18.0-14.5) | -14.9<br>(-16.7-13.1) | 0.10                     | 0.68   |           |
| Weight Change, kg                                                  | -16.0<br>(-18.1-13.8) | -19.0<br>(-21.2-16.9) | -20.7<br>(-22.9-18.4) | -20.6<br>(-23.0-18.3) | -19.6<br>(-22.0-17.3) | -19.3<br>(-21.7-16.8) | -20.5<br>(-23.0-18.1) | -18.8<br>(-21.3-16.3) | 0.10                     | 0.72   |           |

Abbreviations: LAGB, laparoscopic adjustable gastric banding; RYGB, Roux-en-Y gastric bypass.

<sup>a</sup>Weight change from baseline. Negative values indicate weight loss.

<sup>b</sup>Data collection ended before the 7 year assessment of 498 RYGB and 202 LAGB participants.

<sup>c</sup>Means (95% Confidence Interval) are based on mixed models, adjusted for baseline factors independently related to missing follow-up data (i.e., site, age and smoking).

**eTable 3.** Observed Prevalence, Remission, and Incidence of Comorbidities<sup>a</sup>, by Time Point in Relation to Bariatric Surgery

|                    | %, No./Total |           |        |          |        |          |        |          |        |          |        |          |        |         |
|--------------------|--------------|-----------|--------|----------|--------|----------|--------|----------|--------|----------|--------|----------|--------|---------|
|                    | Baseline     |           | Year 1 |          | Year 2 |          | Year 3 |          | Year 4 |          | Year 5 |          | Year 7 |         |
| <b>RYGB</b>        |              |           |        |          |        |          |        |          |        |          |        |          |        |         |
| Diabetes           |              |           |        |          |        |          |        |          |        |          |        |          |        |         |
| Prevalence         | 35.4         | 583/1646  | 11.0   | 123/1122 | 10.3   | 97/942   | 12.0   | 112/933  | 13.7   | 132/964  | 14.8   | 148/999  | 14.4   | 98/681  |
| Remission          | NA           | NA        | 69.7   | 264/379  | 71.3   | 233/327  | 67.5   | 216/320  | 63.7   | 218/342  | 61.4   | 212/345  | 58.9   | 129/219 |
| Incidence          | NA           | NA        | 0.3    | 2/686    | 0.4    | 2/575    | 0.9    | 5/562    | 0.7    | 4/577    | 1.3    | 8/605    | 1.2    | 5/433   |
| High LDL           |              |           |        |          |        |          |        |          |        |          |        |          |        |         |
| Prevalence         | 36.6         | 515/1406  | 16.2   | 140/866  | 17.3   | 123/710  | 17.8   | 129/724  | 18.2   | 133/732  | 17.6   | 133/755  | 16.1   | 82/509  |
| Remission          | NA           | NA        | 62.0   | 181/292  | 58.1   | 143/246  | 59.7   | 151/253  | 58.9   | 149/253  | 60.8   | 158/260  | 62.9   | 105/167 |
| Incidence          | NA           | NA        | 1.6    | 7/453    | 1.6    | 6/369    | 2.5    | 9/354    | 2.8    | 10/364   | 4.1    | 15/368   | 4.7    | 13/277  |
| High triglycerides |              |           |        |          |        |          |        |          |        |          |        |          |        |         |
| Prevalence         | 23.8         | 340/1426  | 2.7    | 25/922   | 2.9    | 22/768   | 4.7    | 37/785   | 4.1    | 32/779   | 3.2    | 25/793   | 5.2    | 28/537  |
| Remission          | NA           | NA        | 91.5   | 184/201  | 92.2   | 153/166  | 85.8   | 139/162  | 83.2   | 134/161  | 91.5   | 150/164  | 85.8   | 103/120 |
| Incidence          | NA           | NA        | 1.0    | 6/607    | 1.0    | 5/502    | 1.6    | 8/496    | 0.6    | 3/494    | 1.6    | 8/501    | 2.6    | 9/352   |
| Low HDL            |              |           |        |          |        |          |        |          |        |          |        |          |        |         |
| Prevalence         | 38.8         | 648/1671  | 10.6   | 126/1190 | 5.9    | 60/1016  | 6.1    | 61/1001  | 7.7    | 76/985   | 8.1    | 84/1034  | 6.2    | 43/692  |
| Remission          | NA           | NA        | 76.0   | 332/437  | 85.3   | 301/353  | 85.7   | 293/342  | 79.8   | 272/341  | 81.4   | 288/354  | 85.1   | 205/241 |
| Incidence          | NA           | NA        | 2.7    | 19/710   | 1.1    | 7/630    | 1.5    | 9/616    | 1.1    | 7/612    | 2.5    | 16/643   | 1.4    | 6/435   |
| Hypertension       |              |           |        |          |        |          |        |          |        |          |        |          |        |         |
| Prevalence         | 68.9         | 1159/1682 | 40.6   | 574/1415 | 42.7   | 499/1169 | 45.9   | 509/1109 | 50.5   | 566/1122 | 51.2   | 595/1162 | 52.5   | 411/783 |
| Remission          | NA           | NA        | 45.4   | 436/960  | 43.3   | 340/786  | 39.3   | 291/741  | 34.4   | 258/751  | 33.1   | 259/782  | 32.3   | 168/520 |
| Incidence          | NA           | NA        | 6.7    | 28/416   | 10.1   | 35/346   | 12.1   | 40/331   | 14.6   | 49/335   | 14.3   | 49/342   | 18.6   | 44/236  |
| <b>LAGB</b>        |              |           |        |          |        |          |        |          |        |          |        |          |        |         |
| Diabetes           |              |           |        |          |        |          |        |          |        |          |        |          |        |         |
| Prevalence         | 28.8         | 164/569   | 22.7   | 93/410   | 22.4   | 78/348   | 22.9   | 83/363   | 21.8   | 75/344   | 24.5   | 88/359   | 24.9   | 51/205  |
| Remission          | NA           | NA        | 29.2   | 35/120   | 35.0   | 35/100   | 28.6   | 28/98    | 33.0   | 30/91    | 26.3   | 25/95    | 24.0   | 12/50   |
| Incidence          | NA           | NA        | 0.7    | 2/268    | 2.2    | 5/230    | 3.2    | 8/247    | 3.9    | 9/231    | 4.6    | 11/237   | 4.9    | 7/144   |
| High LDL           |              |           |        |          |        |          |        |          |        |          |        |          |        |         |
| Prevalence         | 36.7         | 177/482   | 37.7   | 119/316  | 35.7   | 100/280  | 39.0   | 111/285  | 39.7   | 110/277  | 38.3   | 111/290  | 35.5   | 60/169  |
| Remission          | NA           | NA        | 24.6   | 27/110   | 24.3   | 25/103   | 22.7   | 22/97    | 26.4   | 24/91    | 27.7   | 26/94    | 30.2   | 16/53   |
| Incidence          | NA           | NA        | 10.8   | 17/158   | 8.8    | 12/136   | 14.7   | 21/143   | 17.7   | 23/130   | 20.3   | 27/133   | 15.4   | 14/91   |

**Continued next page**

**eTable 3 Continued**

|                    | %, No./Total |         |        |         |        |         |        |         |        |         |        |         |        |         |
|--------------------|--------------|---------|--------|---------|--------|---------|--------|---------|--------|---------|--------|---------|--------|---------|
|                    | Baseline     |         | Year 1 |         | Year 2 |         | Year 3 |         | Year 4 |         | Year 5 |         | Year 7 |         |
| <b>LAGB</b>        |              |         |        |         |        |         |        |         |        |         |        |         |        |         |
| High triglycerides |              |         |        |         |        |         |        |         |        |         |        |         |        |         |
| Prevalence         | 21.1         | 103/489 | 10.3   | 35/339  | 12.2   | 38/312  | 14.1   | 44/312  | 12.5   | 37/297  | 13.5   | 41/304  | 9.4    | 17/180  |
| Remission          | NA           | NA      | 63.2   | 36/57   | 65.4   | 34/52   | 62.1   | 36/58   | 64.9   | 37/57   | 67.3   | 35/52   | 78.1   | 25/32   |
| Incidence          | NA           | NA      | 3.8    | 9/235   | 6.5    | 14/215  | 6.8    | 14/206  | 6.6    | 12/183  | 8.9    | 17/192  | 4.9    | 6/122   |
| Low HDL            |              |         |        |         |        |         |        |         |        |         |        |         |        |         |
| Prevalence         | 33.3         | 194/582 | 16.6   | 74/445  | 12.1   | 47/390  | 12.1   | 47/389  | 14.1   | 51/363  | 17.3   | 64/370  | 13.7   | 29/212  |
| Remission          | NA           | NA      | 56.8   | 84/148  | 64.7   | 77/119  | 67.3   | 76/113  | 62.8   | 71/113  | 56.4   | 62/110  | 66.7   | 44/66   |
| Incidence          | NA           | NA      | 3.2    | 9/281   | 2.0    | 5/256   | 3.8    | 10/266  | 3.9    | 9/233   | 5.0    | 12/242  | 5.2    | 7/136   |
| Hypertension       |              |         |        |         |        |         |        |         |        |         |        |         |        |         |
| Prevalence         | 62.7         | 367/585 | 56.6   | 284/502 | 53.3   | 232/435 | 56.1   | 245/437 | 60.8   | 250/411 | 60.1   | 255/424 | 62.2   | 148/238 |
| Remission          | NA           | NA      | 19.5   | 59/302  | 22.9   | 59/258  | 19.9   | 51/256  | 15.9   | 39/245  | 17.5   | 44/252  | 17.1   | 24/140  |
| Incidence          | NA           | NA      | 15.6   | 28/179  | 16.6   | 27/163  | 17.1   | 28/164  | 23.7   | 35/148  | 22.6   | 35/155  | 30.1   | 28/93   |

Abbreviations: HDL, high-density lipoprotein; LAGB, laparoscopic adjustable gastric banding; LDL, low-density lipoprotein cholesterol; NA, not applicable; No., number; RYGB, Roux-en-Y gastric bypass.

<sup>a</sup>Remission is the percentage of participants who did not have the comorbidity at follow-up among participants who had the comorbidity at baseline. Incidence is the percentage of participants who had the comorbidity at follow-up among participants who did not have the comorbidity at baseline. The sum of the incidence and the remission samples are slightly smaller than the prevalence sample of the corresponding comorbidity due to missing baseline status.

**eTable 4.** Modeled<sup>a</sup> Prevalence, Remission, and Incidence of Comorbidities<sup>b</sup>, by Time Point in Relation to Bariatric Surgery

|                       | N    | Model-Based Estimates, % (95% Confidence Interval) |             |        |             |        |             |        |             |               |                              |      |             |      |             | P     |                   |
|-----------------------|------|----------------------------------------------------|-------------|--------|-------------|--------|-------------|--------|-------------|---------------|------------------------------|------|-------------|------|-------------|-------|-------------------|
|                       |      | Baseline (BL)                                      |             | Year 1 | Year 2      | Year 3 | Year 4      | Year 5 | Year 7      | Year 7 vs. BL | Trend Years 3-7 <sup>c</sup> |      |             |      |             |       |                   |
| <b>RYGB</b>           |      |                                                    |             |        |             |        |             |        |             |               |                              |      |             |      |             |       |                   |
| Diabetes              |      |                                                    |             |        |             |        |             |        |             |               |                              |      |             |      |             |       |                   |
| Prevalence            | 1723 | 28.3                                               | (26.4-30.3) | 8.5    | (7.2-9.8)   | 7.8    | (6.5-9.1)   | 8.9    | (7.5-10.2)  | 10.0          | (8.6-11.5)                   | 10.8 | (9.3-12.2)  | 11.6 | (9.9-13.4)  | <.001 | <.001             |
| Remission             | 582  | NA                                                 | NA          | 71.2   | (67.0-75.4) | 72.3   | (68.0-76.6) | 69.4   | (65.0-73.8) | 66.3          | (61.8-70.9)                  | 64.6 | (60.0-69.2) | 60.2 | (54.7-65.6) | NA    | <.01              |
| Incidence             | 1060 | NA                                                 | NA          | 0.3    | (0.0-0.7)   | 0.3    | (0.0-0.7)   | 0.9    | (0.2-1.6)   | 0.7           | (0.1-1.3)                    | 1.4  | (0.5-2.3)   | 0.6  | (0.0-1.5)   | NA    | 0.25              |
| High LDL              |      |                                                    |             |        |             |        |             |        |             |               |                              |      |             |      |             |       |                   |
| Prevalence            | 1646 | 33.3                                               | (31.1-35.6) | 13.6   | (11.7-15.4) | 13.7   | (11.8-15.6) | 13.8   | (11.9-15.7) | 14.3          | (12.4-16.2)                  | 14.1 | (12.2-16.0) | 14.3 | (11.9-16.7) | <.001 | 0.57              |
| Remission             | 512  | NA                                                 | NA          | 65.3   | (60.0-70.5) | 63.2   | (58.0-68.5) | 62.7   | (57.3-68.0) | 60.6          | (55.4-65.8)                  | 62.5 | (57.4-67.6) | 60.7 | (54.6-66.8) | NA    | 0.77              |
| Incidence             | 890  | NA                                                 | NA          | 1.5    | (0.4-2.6)   | 1.5    | (0.4-2.7)   | 2.4    | (1.1-3.8)   | 2.5           | (1.2-3.8)                    | 4.4  | (2.6-6.3)   | 4.4  | (2.1-6.7)   | NA    | 0.04              |
| High triglycerides    |      |                                                    |             |        |             |        |             |        |             |               |                              |      |             |      |             |       |                   |
| Prevalence            | 1662 | 23.7                                               | (21.5-25.9) | 2.6    | (1.6-3.6)   | 2.8    | (1.7-3.8)   | 4.6    | (3.3-6.0)   | 4.2           | (2.9-5.4)                    | 3.2  | (2.1-4.3)   | 4.9  | (3.3-6.6)   | <.001 | 0.02 <sup>d</sup> |
| Remission             | 339  | NA                                                 | NA          | 92.1   | (88.3-95.9) | 92.3   | (88.2-96.4) | 86.8   | (81.6-91.9) | 84.1          | (78.8-89.5)                  | 91.9 | (87.7-96.0) | 86.9 | (81.2-92.7) | NA    | 0.68              |
| Incidence             | 1083 | NA                                                 | NA          | 1.0    | (0.3-1.8)   | 1.0    | (0.2-1.8)   | 1.5    | (0.5-2.5)   | 0.6           | (0.0-1.2)                    | 1.8  | (0.7-3.0)   | 2.6  | (0.8-4.3)   | NA    | 0.25              |
| Low HDL               |      |                                                    |             |        |             |        |             |        |             |               |                              |      |             |      |             |       |                   |
| Prevalence            | 1725 | 34.9                                               | (32.6-36.9) | 9.5    | (8.1-11.0)  | 5.3    | (4.1-6.5)   | 5.4    | (4.2-6.7)   | 6.9           | (5.5-8.2)                    | 7.3  | (5.9-8.7)   | 5.8  | (4.3-7.3)   | <.001 | 0.29              |
| Remission             | 646  | NA                                                 | NA          | 75.7   | (71.8-79.6) | 84.6   | (81.2-88.0) | 85.5   | (82.2-88.8) | 82.7          | (79.0-86.3)                  | 83.2 | (79.5-86.8) | 83.7 | (79.7-87.7) | NA    | 0.23              |
| Incidence             | 1021 | NA                                                 | NA          | 2.7    | (1.5-3.8)   | 1.0    | (0.2-1.8)   | 1.2    | (0.4-2.0)   | 1.1           | (0.3-1.9)                    | 2.6  | (1.4-3.9)   | 1.5  | (0.6-2.5)   | NA    | 0.26              |
| Hypertension          |      |                                                    |             |        |             |        |             |        |             |               |                              |      |             |      |             |       |                   |
| Prevalence            | 1728 | 67.6                                               | (65.4-69.7) | 38.9   | (36.6-41.1) | 40.2   | (37.8-42.6) | 43.4   | (40.9-45.9) | 47.1          | (44.6-49.6)                  | 48.0 | (45.5-50.6) | 51.6 | (48.6-54.6) | <.001 | <.001             |
| Remission             | 1156 | NA                                                 | NA          | 46.1   | (43.1-49.1) | 46.1   | (42.8-49.3) | 41.3   | (38.0-44.6) | 37.2          | (34.0-40.5)                  | 35.4 | (32.1-38.7) | 33.4 | (29.9-37.0) | NA    | <.01              |
| Incidence             | 522  | NA                                                 | NA          | 6.7    | (4.4-9.0)   | 10.6   | (7.5-13.6)  | 12.7   | (9.3-16.1)  | 14.6          | (11.1-18.1)                  | 15.2 | (11.6-18.8) | 19.2 | (14.5-23.9) | NA    | 0.01              |
| <b>LAGB</b>           |      |                                                    |             |        |             |        |             |        |             |               |                              |      |             |      |             |       |                   |
| Diabetes <sup>e</sup> |      |                                                    |             |        |             |        |             |        |             |               |                              |      |             |      |             |       |                   |
| Prevalence            | 604  | 29.0                                               | (25.6-32.5) | 21.1   | (17.9-24.2) | 21.6   | (18.3-24.9) | 22.6   | (19.3-25.9) | 23.5          | (20.1-27.0)                  | 24.4 | (20.9-27.9) | 28.1 | (23.6-32.5) | 0.63  | 0.01              |
| Remission             | 162  | NA                                                 | NA          | 30.7   | (22.8-38.7) | 34.7   | (26.5-42.9) | 29.3   | (21.6-37.1) | 28.9          | (20.4-37.4)                  | 29.2 | (21.0-37.4) | 20.3 | (9.7-30.9)  | NA    | 0.19              |
| High LDL              |      |                                                    |             |        |             |        |             |        |             |               |                              |      |             |      |             |       |                   |
| Prevalence            | 578  | 36.2                                               | (32.4-40.0) | 33.7   | (29.5-37.8) | 31.8   | (27.7-35.9) | 34.3   | (30.0-38.5) | 36.8          | (32.3-41.3)                  | 36.9 | (32.4-41.4) | 37.6 | (32.5-42.8) | 0.80  | 0.55              |
| Remission             | 177  | NA                                                 | NA          | 26.1   | (17.8-34.4) | 27.1   | (18.5-35.7) | 24.3   | (16.5-32.0) | 26.4          | (18.0-34.8)                  | 26.4 | (18.0-34.7) | 25.0 | (14.8-35.1) | NA    | 0.80              |
| Incidence             | 305  | NA                                                 | NA          | 8.9    | (4.4-13.4)  | 8.8    | (4.6-12.9)  | 12.1   | (7.2-16.9)  | 13.1          | (8.1-18.1)                   | 17.1 | (11.2-22.9) | 15.1 | (8.8-21.3)  | NA    | 0.20              |

*Continued on next page.*

**eTable 4 Continued**

|                    | N   | Model-Based Estimates, % (95% Confidence Interval) |             |        |             |        |             |        |             |               |                              |      |             |      |             | P     |       |
|--------------------|-----|----------------------------------------------------|-------------|--------|-------------|--------|-------------|--------|-------------|---------------|------------------------------|------|-------------|------|-------------|-------|-------|
|                    |     | Baseline (BL)                                      |             | Year 1 | Year 2      | Year 3 | Year 4      | Year 5 | Year 7      | Year 7 vs. BL | Trend Years 3-7 <sup>c</sup> |      |             |      |             |       |       |
| <b>LAGB</b>        |     |                                                    |             |        |             |        |             |        |             |               |                              |      |             |      |             |       |       |
| High triglycerides |     |                                                    |             |        |             |        |             |        |             |               |                              |      |             |      |             |       |       |
| Prevalence         | 583 | 21.3                                               | (17.8-24.9) | 10.7   | (7.7-13.7)  | 12.1   | (8.8-15.4)  | 13.3   | (9.8-16.7)  | 12.0          | (8.6-15.3)                   | 13.0 | (9.5-16.4)  | 9.7  | (5.8-13.6)  | <.001 | 0.19  |
| Remission          | 103 | NA                                                 | NA          | 64.9   | (51.9-77.9) | 68.2   | (55.0-81.5) | 66.2   | (54.1-78.4) | 65.8          | (53.6-78.1)                  | 70.6 | (59.1-82.0) | 80.8 | (68.4-93.2) | NA    | 0.04  |
| Incidence          | 386 | NA                                                 | NA          | 3.8    | (1.5-6.1)   | 5.9    | (3.1-8.8)   | 6.1    | (3.0-9.2)   | 6.2           | (2.8-9.6)                    | 8.7  | (4.9-12.5)  | 5.2  | (0.8-9.6)   | NA    | 0.85  |
| Low HDL            |     |                                                    |             |        |             |        |             |        |             |               |                              |      |             |      |             |       |       |
| Prevalence         | 605 | 33.0                                               | (29.2-36.7) | 16.5   | (13.2-19.8) | 13.4   | (10.3-16.5) | 13.9   | (10.7-17.1) | 15.1          | (11.7-18.5)                  | 18.3 | (14.7-21.9) | 16.3 | (12.0-20.7) | <.001 | 0.052 |
| Remission          | 194 | NA                                                 | NA          | 55.4   | (47.7-63.1) | 61.6   | (53.4-69.7) | 64.0   | (56.0-72.1) | 60.5          | (52.2-68.8)                  | 56.3 | (47.8-64.8) | 61.0 | (51.1-70.9) | NA    | 0.61  |
| Incidence          | 388 | NA                                                 | NA          | 3.2    | (1.2-5.2)   | 2.1    | (0.5-3.8)   | 4.1    | (1.9-6.3)   | 3.9           | (1.4-6.3)                    | 4.9  | (2.4-7.4)   | 6.2  | (2.6-9.7)   | NA    | 0.13  |
| Hypertension       |     |                                                    |             |        |             |        |             |        |             |               |                              |      |             |      |             |       |       |
| Prevalence         | 609 | 63.0                                               | (59.5-66.6) | 56.1   | (52.3-59.8) | 53.8   | (49.8-57.8) | 56.4   | (52.5-60.3) | 59.7          | (55.7-63.7)                  | 59.6 | (55.6-63.6) | 63.1 | (58.1-68.1) | 0.99  | 0.054 |
| Remission          | 367 | NA                                                 | NA          | 20.8   | (16.5-25.1) | 24.3   | (19.2-29.4) | 21.4   | (16.8-26.0) | 18.2          | (13.6-22.8)                  | 19.7 | (14.9-24.5) | 16.9 | (11.5-22.4) | NA    | 0.39  |
| Incidence          | 218 | NA                                                 | NA          | 15.6   | (10.3-20.9) | 16.2   | (10.6-21.8) | 16.7   | (11.1-22.2) | 23.4          | (16.8-30.0)                  | 22.7 | (16.2-29.2) | 28.1 | (19.5-36.7) | NA    | 0.12  |

Abbreviations: HDL, high-density lipoprotein; LAGB, laparoscopic adjustable gastric banding; LDL, low-density lipoprotein NA, not applicable; RYGB, Roux-en-Y gastric bypass.

<sup>a</sup>Modeled percentage (95% CI) are based on mixed models, adjusted for baseline factors independently related to missing follow-up data (i.e., site, age and smoking).

<sup>b</sup>Remission is the percentage of participants who did not have the comorbidity at follow-up among participants who had the comorbidity at baseline. Incidence is the percentage of participants who had the comorbidity at follow-up among participants who did not have the comorbidity at baseline.

<sup>c</sup>P-value for a linear trend is reported unless a quadratic trend is significant.

<sup>d</sup>P-value for quadratic trend.

<sup>e</sup>Incidence of diabetes is too rare to model given the sample size. Observed data reported in **eTable 3**.



**eTable 5.** Modeled Percent Weight Change<sup>a</sup> and Subsequent Bariatric Procedures after Initial Bariatric Procedure by Weight Trajectory Group Membership<sup>b</sup>

| Weight Trajectory Groups <sup>b</sup> | Percent Weight Change from Baseline<br>Model-based Estimates, Mean (95% Confidence Interval) <sup>c</sup> |                         |                         |                         |                         | P for trend<br>Years 3-7 |           | Percent Weight Change<br>from Baseline |                | Participants who had a<br>Subsequent Procedure <sup>e</sup> , N(%) |           |          |
|---------------------------------------|-----------------------------------------------------------------------------------------------------------|-------------------------|-------------------------|-------------------------|-------------------------|--------------------------|-----------|----------------------------------------|----------------|--------------------------------------------------------------------|-----------|----------|
|                                       | Year-3                                                                                                    | Year-4                  | Year-5                  | Year-6                  | Year-7                  | linear                   | quadratic | Change<br>Years 3-7                    | p <sup>d</sup> | New                                                                | Reversal  | Revision |
| <b>RYGB</b>                           |                                                                                                           |                         |                         |                         |                         |                          |           |                                        |                |                                                                    |           |          |
| Group 1 (n=84; 4.8%)                  | -12.4<br>(-15.1- -9.8)                                                                                    | -10.2<br>(-12.7- -7.6)  | -9.6<br>(-12.3- -6.9)   | -10.6<br>(-13.6- -7.6)  | -11.7<br>(-14.9- -8.5)  | 0.12                     | <.01      | 0.7<br>(-1.9-3.4)                      | 0.59           | 0                                                                  | 0         | 0        |
| Group 2 (n=375; 21.6%)                | -22.4<br>(-23.1- -21.6)                                                                                   | -20.0<br>(-20.8- -19.2) | -18.1<br>(-19.0- -17.3) | -18.6<br>(-19.4- -17.7) | -17.1<br>(-18.1- -16.1) | <.001                    | <.001     | 5.3<br>(4.3-6.2)                       | <.001          | 0                                                                  | 1 (0.3)   | 2 (0.5)  |
| Group 3 (n=482; 27.8%)                | -30.3<br>(-31.0- -29.6)                                                                                   | -27.5<br>(-28.2- -26.7) | -26.5<br>(-27.3- -25.8) | -26.1<br>(-26.9- -25.4) | -24.3<br>(-25.1- -23.5) | <.001                    | <.001     | 6.0<br>(5.3-6.7)                       | <.001          | 0                                                                  | 1 (0.2)   | 6 (1.2)  |
| Group 4 (n=456; 26.3%)                | -38.1<br>(-38.6- -37.5)                                                                                   | -36.5<br>(-37.1- -36.0) | -35.3<br>(-35.9- -34.7) | -35.5<br>(-36.1- -34.8) | -33.4<br>(-34.2- -32.6) | <.001                    | 0.79      | 4.7<br>(3.9-5.5)                       | <.001          | 0                                                                  | 1 (0.2)   | 1 (0.2)  |
| Group 5 (n=106; 6.1%)                 | -26.9<br>(-28.6- -25.3)                                                                                   | -28.6<br>(-30.2- -27.0) | -31.6<br>(-33.2- -30.1) | -34.5<br>(-36.1- -32.9) | -35.0<br>(-37.5- -32.6) | <.001                    | 0.56      | -8.1<br>(-10.7- 5.5)                   | <.001          | 0                                                                  | 0         | 0        |
| Group 6 (n=231; 13.3%)                | -47.4<br>(-48.2- -46.5)                                                                                   | -46.6<br>(-47.4- -45.7) | -46.0<br>(-46.9- -45.1) | -46.3<br>(-47.2- -45.3) | -44.5<br>(-45.6- -43.3) | <.001                    | 0.32      | 2.9<br>(1.6-4.1)                       | <.001          | 0                                                                  | 0         | 2 (0.9)  |
| <b>LAGB</b>                           |                                                                                                           |                         |                         |                         |                         |                          |           |                                        |                |                                                                    |           |          |
| Group 1 (n=32; 5.3%)                  | 3.3<br>(0.9-5.6)                                                                                          | 6.4<br>(4.4-8.3)        | 7.7<br>(5.4-10.0)       | 7.2<br>(5.3-9.1)        | 10.9<br>(6.3-15.6)      | <.001                    | 0.40      | 7.7<br>(3.0-12.4)                      | <.01           | 2 (6.3)                                                            | 11 (34.4) | 0        |
| Group 2 (n=123; 20.2%)                | -5.6<br>(-7.4- -3.9)                                                                                      | -5.7<br>(-7.5- -4.0)    | -4.8<br>(-6.6- -3.0)    | -6.8<br>(-8.9- -4.7)    | -5.5<br>(-7.5- -3.5)    | 0.44                     | 0.88      | 0.1<br>(-1.4-1.5)                      | 0.92           | 8 (6.5)                                                            | 12 (9.8)  | 9 (7.3)  |
| Group 3 (n=36; 5.9%)                  | -16.0<br>(-18.5- -13.5)                                                                                   | -7.6<br>(-10.2- -5.0)   | -5.0<br>(-7.7- -2.2)    | -3.0<br>(-6.0- -0.1)    | -1.8<br>(-5.1- -1.4)    | <.001                    | <.001     | 14.2<br>(11.2-17.2)                    | <.001          | 3 (8.3)                                                            | 6 (16.7)  | 3 (8.3)  |
| Group 4 (n=239; 39.2%)                | -16.0<br>(-17.4- -14.7)                                                                                   | -15.3<br>(-16.6- -14.0) | -15.5<br>(-16.8- -14.2) | -17.1<br>(-18.5- -15.7) | -16.4<br>(-18.0- -14.8) | 0.11                     | 0.34      | -0.3<br>(-1.8-1.1)                     | 0.63           | 33 (13.8)                                                          | 7 (2.9)   | 19 (8.0) |
| Group 5 (n=93; 15.3%)                 | -27.5<br>(-29.3- -25.6)                                                                                   | -25.4<br>(-27.2- -23.7) | -23.3<br>(-25.1- -21.6) | -22.6<br>(-24.3- -20.9) | -19.9<br>(-22.0- -17.7) | <.001                    | 0.99      | 7.6<br>(5.2-10.1)                      | <.001          | 9 (9.7)                                                            | 4 (4.3)   | 8 (8.6)  |
| Group 6 (n=50; 8.2%)                  | -23.4<br>(-27.7- -19.2)                                                                                   | -27.8<br>(-32.0- -23.7) | -31.4<br>(-35.2- -27.6) | -34.0<br>(-37.8- -30.1) | -33.4<br>(-37.4- -29.5) | <.001                    | <.01      | -10.0<br>(-13.8- -6.2)                 | <.001          | 14 (28.0)                                                          | 0         | 4 (8.0)  |
| Group 7 (n=37; 6.1%)                  | -35.0<br>(-39.9- -30.2)                                                                                   | -36.7<br>(-41.3- -32.2) | -37.7<br>(-42.3- -33.1) | -37.2<br>(-41.7- -32.7) | -35.7<br>(-40.9- -30.5) | 0.89                     | <.01      | -0.7<br>(-4.3-3.0)                     | 0.69           | 4 (5.5)                                                            | 1 (2.7)   | 3 (6.5)  |

Abbreviations: LAGB, laparoscopic adjustable gastric banding; RYGB, Roux-en-Y gastric bypass.

<sup>a</sup>Percent weight change from baseline. Negative values indicate weight loss. Positive values indicate weight gain.

<sup>b</sup>Growth mixture models were used to estimate weight change trajectories for each participant and to group participants with similar modeled trajectories. Trajectory groups, shown in **Figure 4** of the main results, are ordered from worst (1) to best (6 or 7) 7-year weight change.

<sup>c</sup>Means (95% CI) are based on mixed models, adjusted for baseline factors independently related to missing follow-up data (i.e., site, age and smoking).

<sup>d</sup>The *P*-value indicates whether the average difference in percent weight change from baseline between year 3 and year 7 is significantly different from zero.

<sup>e</sup>Participants who had more than one type of subsequent surgery are categorized according to the following hierarchy: new procedure, reversal,

revision.

**eTable 6.** Baseline Characteristics by Weight Trajectory Group

**eTable 6a.** Baseline Characteristics by RYGB Weight Trajectory Group Membership<sup>a</sup>.

|                                                             | RYGB Weight Trajectory Groups |                     |                     |                     |                    |                     | P <sup>b</sup> |
|-------------------------------------------------------------|-------------------------------|---------------------|---------------------|---------------------|--------------------|---------------------|----------------|
|                                                             | 1<br>(n=84)                   | 2<br>(n=375)        | 3<br>(n=482)        | 4<br>(n=456)        | 5<br>(n=106)       | 6<br>(n=231)        |                |
| <b>Age</b> (years)                                          |                               |                     |                     |                     |                    |                     | <.001          |
| Median                                                      | 48.5                          | 47.0                | 45.0                | 44.0                | 51.0               | 42.0                |                |
| (25 <sup>th</sup> -75 <sup>th</sup> )                       | (42.5-56.0)                   | (39.0-55.0)         | (37.0-53.0)         | (35.0-52.0)         | (44.0-58.0)        | (34.0-50.0)         |                |
| Range                                                       | 24.0-70.0                     | 19.0-70.0           | 19.0-73.0           | 19.0-75.0           | 20.0-70.0          | 19.0-69.0           |                |
| <b>Sex</b> - n (%)                                          |                               |                     |                     |                     |                    |                     | <.001          |
| Female                                                      | 59 (70.2)                     | 290 (77.3)          | 370 (76.8)          | 385 (84.4)          | 81 (76.4)          | 201 (87)            |                |
| Male                                                        | 25 (29.8)                     | 85 (22.7)           | 112 (23.2)          | 71 (15.6)           | 25 (23.6)          | 30 (13.0)           |                |
| <b>Race</b> - n (%)                                         |                               |                     |                     |                     |                    |                     | 0.03           |
| White                                                       | N=84<br>67 (79.8)             | N=367<br>296 (80.7) | N=480<br>418 (87.1) | N=451<br>393 (87.1) | N=105<br>83 (79.0) | N=229<br>202 (88.2) |                |
| Black                                                       | 14 (16.7)                     | 58 (15.8)           | 48 (10.0)           | 38 (8.4)            | 17 (16.2)          | 21 (9.2)            |                |
| Other                                                       | 3 (3.6)                       | 13 (3.5)            | 14 (2.9)            | 20 (4.4)            | 5 (4.8)            | 6 (2.6)             |                |
| <b>Ethnicity</b> - n (%)                                    |                               |                     |                     |                     |                    |                     | 0.99           |
| Hispanic                                                    | N=84<br>5 (6.0)               | N=374<br>22 (5.9)   | N=482<br>14 (2.9)   | N=456<br>27 (5.9)   | N=106<br>6 (5.7)   | N=231<br>11 (4.8)   |                |
| Non-Hispanic                                                | 79 (94.0)                     | 352 (94.1)          | 468 (97.1)          | 429 (94.1)          | 100 (94.3)         | 220 (95.2)          |                |
| <b>Smoker</b> - n (%)                                       |                               |                     |                     |                     |                    |                     | <.001          |
| Yes                                                         | N=84<br>6 (7.1)               | N=375<br>42 (11.2)  | N=482<br>44 (9.1)   | N=456<br>88 (19.3)  | N=106<br>19 (17.9) | N=231<br>51 (22.1)  |                |
| No                                                          | 78 (92.9)                     | 333 (88.8)          | 438 (90.9)          | 368 (80.7)          | 87 (82.1)          | 180 (77.9)          |                |
| <b>Weight</b> (kg)                                          |                               |                     |                     |                     |                    |                     | 0.46           |
| Median                                                      | 129.1                         | 131.4               | 130.0               | 128.0               | 130.9              | 133.6               |                |
| (25 <sup>th</sup> -75 <sup>th</sup> )                       | (114.8-151.1)                 | (115.9-151.4)       | (116.8-145.5)       | (114.5-148.9)       | (120.5-149.1)      | (120.0-151.8)       |                |
| Range                                                       | 82.7-232.3                    | 83.2-223.6          | 87.3-239.1          | 75.0-236.8          | 87.7-240.0         | 88.6-233.6          |                |
| <b>Body mass index</b><br>(kg/m <sup>2</sup> ) <sup>b</sup> |                               |                     |                     |                     |                    |                     | <.001          |
| Median                                                      | 44.7                          | 47.2                | 45.8                | 46.2                | 47.0               | 49.4                |                |
| (25 <sup>th</sup> -75 <sup>th</sup> )                       | (40.8-52.3)                   | (41.7-51.8)         | (42.5-50.7)         | (42.2-51.6)         | (42.3-52.4)        | (44.7-53.9)         |                |
| Range                                                       | 35.6-72.5                     | 33.8-77.2           | 33.7-76.8           | 34.6-81.0           | 34.7-77.6          | 35.3-70.5           |                |
| <b>Comorbidities</b> –<br>No./Total (%)                     |                               |                     |                     |                     |                    |                     |                |
| Diabetes                                                    | 49/81 (60.5)                  | 173/356 (48.6)      | 145/462 (31.4)      | 120/434 (27.6)      | 46/97 (47.4)       | 49/212 (23.1)       | <.001          |
| High LDL                                                    | 33/68 (48.5)                  | 125/298 (41.9)      | 150/405 (37.0)      | 110/361 (30.5)      | 40/88 (45.5)       | 54/182 (29.7)       | <.01           |
| High triglycerides                                          | 19/71 (26.8)                  | 74/301 (24.6)       | 92/408 (22.5)       | 89/365 (24.4)       | 26/89 (29.2)       | 39/188 (20.7)       | 0.58           |
| Low HDL                                                     | 37/82 (45.1)                  | 135/359 (37.6)      | 179/468 (38.2)      | 173/442 (39.1)      | 47/98 (48.0)       | 75/218 (34.4)       | 0.58           |
| Hypertension                                                | 59/79 (74.7)                  | 269/362 (74.3)      | 313/471 (66.5)      | 292/440 (66.4)      | 83/104 (79.8)      | 140/222 (63.1)      | 0.03           |

Abbreviations: HDL, high-density lipoprotein cholesterol; LDL, low-density lipoprotein cholesterol; RYGB, Roux-en-Y gastric bypass.

<sup>a</sup>Growth mixture models were used to estimate weight change trajectories for each participant and to group participants with similar modeled trajectories. Trajectory groups, shown in Figure 2 of the main results, are ordered from worst (1) to best (6) 7-year weight change.

<sup>b</sup>P values from Cochran-Armitage Trend Test for dichotomous variables, Kendall's Tau-b for categorical variables with more than 2 categories, and Jonckheere-Terpstra trend test for continuous variables.

**eTable 6b.** Baseline Characteristics by LAGB Weight Trajectory Group Membership<sup>a</sup>.

|                                                           | LAGB Weight Trajectory Groups |                     |                   |                     |                   |                   |                   | P <sup>b</sup> |
|-----------------------------------------------------------|-------------------------------|---------------------|-------------------|---------------------|-------------------|-------------------|-------------------|----------------|
|                                                           | 1<br>(n=32)                   | 2<br>(n=123)        | 3<br>(n=36)       | 4<br>(n=239)        | 5<br>(n=93)       | 6<br>(n=50)       | 7<br>(n=37)       |                |
| <b>Age (years)</b>                                        |                               |                     |                   |                     |                   |                   |                   | 0.29           |
| Median                                                    | 52.5                          | 45.0                | 46.0              | 49.0                | 49.0              | 44.0              | 44.0              |                |
| (25 <sup>th</sup> -75 <sup>th</sup> )                     | (39.0-63.5)                   | (38.0-56.0)         | (32.0-52.0)       | (38.0-57.0)         | (35.0-56.0)       | (35.0-55.0)       | (36.0-51.0)       |                |
| Range                                                     | 21.0-70.0                     | 21.0-76.0           | 23.0-72.0         | 19.0-78.0           | 18.0-72.0         | 19.0-70.0         | 19.0-66.0         |                |
| <b>Sex - n (%)</b>                                        |                               |                     |                   |                     |                   |                   |                   | <.01           |
| Female                                                    | 23 (71.9)                     | 85 (69.1)           | 26 (72.2)         | 182 (76.2)          | 77 (82.8)         | 42 (84.0)         | 30 (81.1)         |                |
| Male                                                      | 9 (28.1)                      | 38 (30.9)           | 10 (27.8)         | 57 (23.8)           | 16 (17.2)         | 8 (16.0)          | 7 (18.9)          |                |
| <b>Race - n (%)</b>                                       |                               |                     |                   |                     |                   |                   |                   | 0.94           |
| White                                                     | N=32<br>31 (96.9)             | N=123<br>111 (90.2) | N=36<br>30 (83.3) | N=236<br>209 (88.6) | N=92<br>83 (90.2) | N=50<br>44 (88.0) | N=37<br>35 (94.6) |                |
| Black                                                     | 1 (3.1)                       | 9 (7.3)             | 5 (13.9)          | 21 (8.9)            | 8 (8.7)           | 5 (10.0)          | 2 (5.4)           |                |
| Other                                                     | 0 (0)                         | 3 (2.4)             | 1 (2.8)           | 6 (2.5)             | 1 (1.1)           | 1 (2.0)           | 0 (0)             |                |
| <b>Ethnicity - n (%)</b>                                  |                               |                     |                   |                     |                   |                   |                   | 0.01           |
| Hispanic                                                  | N=32<br>0 (0)                 | N=123<br>3 (2.4)    | N=36<br>1 (2.8)   | N=238<br>9 (3.8)    | N=93<br>7 (7.5)   | N=50<br>2 (4.0)   | N=37<br>4 (10.8)  |                |
| Non-Hispanic                                              | 32 (100)                      | 120 (97.6)          | 35 (97.2)         | 229 (96.2)          | 86 (92.5)         | 48 (96.0)         | 33 (89.2)         |                |
| <b>Smoker -n (%)</b>                                      |                               |                     |                   |                     |                   |                   |                   | 0.73           |
| Yes                                                       | N=32<br>1 (3.1)               | N=123<br>10 (8.1)   | N=36<br>6 (16.7)  | N=239<br>21 (8.8)   | N=93<br>13 (14.0) | N=50<br>2 (4.0)   | N=37<br>3 (8.1)   |                |
| No                                                        | 31 (96.9)                     | 113 (91.9)          | 30 (83.3)         | 218 (91.2)          | 80 (86.0)         | 48 (96.0)         | 34 (91.9)         |                |
| <b>Weight (kg)</b>                                        |                               |                     |                   |                     |                   |                   |                   | 0.07           |
| Median                                                    | 115.7                         | 127.3               | 124.5             | 120.9               | 116.8             | 121.8             | 133.2             |                |
| (25 <sup>th</sup> -75 <sup>th</sup> )                     | (109.1-146.6)                 | (115.5-143.2)       | (115.0-141.6)     | (111.4-138.2)       | (108.2-127.3)     | (109.5-132.7)     | (117.7-148.6)     |                |
| Range                                                     | 94.5-198.6                    | 85.0-245.5          | 91.8-180.9        | 87.3-200.0          | 88.6-181.4        | 89.5-188.6        | 92.3-171.8        |                |
| <b>Body mass index<br/>(kg/m<sup>2</sup>)<sup>b</sup></b> |                               |                     |                   |                     |                   |                   |                   | 0.40           |
| Median                                                    | 44.1                          | 44.0                | 44.0              | 43.5                | 42.2              | 44.0              | 46.0              |                |
| (25 <sup>th</sup> -75 <sup>th</sup> )                     | (40.5-50.1)                   | (40.6-50.8)         | (42.0-48.0)       | (39.9-47.1)         | (39.6-45.7)       | (41.1-47.0)       | (42.1-51.3)       |                |
| Range                                                     | 33.0-58.7                     | 34.8-87.3           | 36.2-65.2         | 33.7-64.3           | 33.8-57.9         | 36.1-64.4         | 35.5-66.5         |                |
| <b>Comorbidities-<br/>No./Total (%)</b>                   |                               |                     |                   |                     |                   |                   |                   |                |
| Diabetes                                                  | 9/28 (32.1)                   | 37/110 (33.6)       | 3/34 (8.8)        | 74/224 (33.0)       | 22/90 (24.4)      | 14/50 (28.0)      | 5/33 (15.2)       | 0.13           |
| High LDL                                                  | 7/23 (30.4)                   | 33/88 (37.5)        | 6/29 (20.7)       | 86/204 (42.2)       | 23/65 (35.4)      | 15/44 (34.1)      | 7/29 (24.1)       | 0.68           |
| High triglycerides                                        | 7/25 (28.0)                   | 23/89 (25.8)        | 8/29 (27.6)       | 38/207 (18.4)       | 10/65 (15.4)      | 11/43 (25.6)      | 6/31 (19.4)       | 0.21           |
| Low HDL                                                   | 10/34 (33.3)                  | 54/112 (48.2)       | 11/34 (32.4)      | 67/230 (29.1)       | 23/90 (25.6)      | 19/50 (38.0)      | 10/36 (27.8)      | 0.02           |
| Hypertension                                              | 23/32 (71.9)                  | 77/117 (65.8)       | 23/35 (65.7)      | 144/226 (63.7)      | 57/93 (61.3)      | 25/48 (52.1)      | 18/34 (52.9)      | 0.03           |

Abbreviations: HDL, high-density lipoprotein cholesterol; LDL, low-density lipoprotein cholesterol; LAGB, laparoscopic adjustable gastric banding.

<sup>a</sup>Growth mixture models were used to estimate weight change trajectories for each participant and to group participants with similar modeled trajectories. Trajectory groups, shown in Figure 2 of the main results, are ordered from worst (1) to best (6) 7-year weight change.

<sup>b</sup>P values from Cochran-Armitage Trend Test for dichotomous variables, Kendall's Tau-b for categorical variables with more than 2 categories, and Jonckheere-Terpstra trend test for continuous variables.

**eTable 7. Remission of Comorbid Conditions**

**eTable 7a. Remission of Diabetes<sup>a</sup> by RYGB Weight Trajectory Group Membership, by Time Point in Relation to Bariatric Surgery**

| Diabetes        | % No./Total |             |        |             |        |             |        |             |        |             |        |             | P                   |
|-----------------|-------------|-------------|--------|-------------|--------|-------------|--------|-------------|--------|-------------|--------|-------------|---------------------|
|                 | Year 1      |             | Year 2 |             | Year 3 |             | Year 4 |             | Year 5 |             | Year 7 |             |                     |
| Group 1 (n=49)  |             |             |        |             |        |             |        |             |        |             |        |             | <0.001 <sup>b</sup> |
| Remission       |             |             |        |             |        |             |        |             |        |             |        |             | 0.12 <sup>c</sup>   |
| ARR             | 76.5        | 26/34       | 73.9   | 17/23       | 52.2   | 12/23       | 50.0   | 16/32       | 42.9   | 12/28       | 46.7   | 7/15        |                     |
| Group 2 (n=173) | Ref         |             | Ref    |             | Ref    |             | Ref    |             | Ref    |             | Ref    |             |                     |
| Remission       |             |             |        |             |        |             |        |             |        |             |        |             |                     |
| ARR             | 68.6        | 70/102      | 66.7   | 58/87       | 62.0   | 57/92       | 55.1   | 54/98       | 52.9   | 54/102      | 46.4   | 26/56       |                     |
| Group 3 (n=145) | 0.94        | (0.75-1.17) | 1.00   | (0.74-1.35) | 1.17   | (0.79-1.74) | 1.11   | (0.76-1.63) | 1.22   | (0.79-1.89) | 1.57   | (0.73-3.38) |                     |
| Remission       |             |             |        |             |        |             |        |             |        |             |        |             |                     |
| ARR             | 66.3        | 63/95       | 71.0   | 66/93       | 73.4   | 58/79       | 72.0   | 59/82       | 72.3   | 60/83       | 63.3   | 38/60       |                     |
| Group 4 (n=120) | 0.91        | (0.73-1.15) | 1.12   | (0.83-1.51) | 1.38   | (0.94-2.04) | 1.39   | (0.95-2.02) | 1.55   | (1.01-2.37) | 1.90   | (0.89-4.04) |                     |
| Remission       |             |             |        |             |        |             |        |             |        |             |        |             |                     |
| ARR             | 71.8        | 56/78       | 76.5   | 52/68       | 71.2   | 52/73       | 68.1   | 49/72       | 65.3   | 47/72       | 63.3   | 31/49       |                     |
| Group 5 (n=46)  | 0.99        | (0.79-1.23) | 1.21   | (0.91-1.63) | 1.43   | (0.98-2.10) | 1.46   | (1.00-2.13) | 1.58   | (1.03-2.42) | 1.96   | (0.92-4.17) |                     |
| Remission       |             |             |        |             |        |             |        |             |        |             |        |             |                     |
| ARR             | 54.5        | 18/33       | 57.1   | 16/28       | 57.1   | 16/28       | 56.7   | 17/30       | 48.4   | 15/31       | 50.0   | 8/16        |                     |
| Group 6 (n=49)  | 0.77        | (0.55-1.07) | 0.94   | (0.65-1.38) | 1.15   | (0.73-1.82) | 1.19   | (0.77-1.84) | 1.31   | (0.81-2.13) | 1.55   | (0.69-3.50) |                     |
| Remission       |             |             |        |             |        |             |        |             |        |             |        |             |                     |
| ARR             | 88.3        | 30/36       | 85.2   | 23/27       | 84.0   | 21/25       | 81.5   | 22/27       | 82.1   | 23/28       | 82.6   | 19/23       |                     |
|                 | 1.08        | (0.85-1.36) | 1.32   | (0.98-1.79) | 1.68   | (1.13-2.47) | 1.64   | (1.11-2.40) | 1.81   | (1.17-2.78) | 2.44   | (1.15-5.17) |                     |

Abbreviations: ARR, Adjusted relative risk; RYGB, Roux-en-Y gastric bypass.

<sup>a</sup> Among participants with diabetes at baseline, observed remission is reported. Poisson mixed models with robust error variance were used to model remission of diabetes, with weight trajectory group membership, time (follow-up assessment) and a time x weight trajectory group interaction term, as well as site, baseline age and smoking status, which were related to missing follow-up data, as fixed effects. Trajectory groups, shown in Figure 4 of the main results, are ordered from worst (1) to best (6) 7-year weight change. Adjusted relative risks of remission in comparison to group 1 are reported by time point.

<sup>b</sup> For weight trajectory group.

<sup>c</sup> For weight trajectory group and time interaction.

**eTable 7b.** Remission of High LDL<sup>a</sup> by RYGB Weight Trajectory Group Membership, by Time Point in Relation to Bariatric Surgery

|                 | %, No./Total |             |        |             |        |             |        |             |        |             |        |             | P                 |
|-----------------|--------------|-------------|--------|-------------|--------|-------------|--------|-------------|--------|-------------|--------|-------------|-------------------|
|                 | Year 1       |             | Year 2 |             | Year 3 |             | Year 4 |             | Year 5 |             | Year 7 |             |                   |
| <b>High LDL</b> |              |             |        |             |        |             |        |             |        |             |        |             | 0.13 <sup>b</sup> |
| Group 1 (n=33)  |              |             |        |             |        |             |        |             |        |             |        |             | 0.20 <sup>c</sup> |
| Remission       | 35.0         | 7/20        | 40.0   | 6/15        | 38.5   | 5/13        | 50.0   | 8/16        | 41.7   | 5/12        | 57.1   | 4/7         |                   |
| ARR             | Ref          |             | Ref    |             | Ref    |             | Ref    |             | Ref    |             | Ref    |             |                   |
| Group 2 (n=125) |              |             |        |             |        |             |        |             |        |             |        |             |                   |
| Remission       | 63.2         | 43/68       | 52.5   | 31/59       | 50.8   | 33/65       | 46.6   | 27/58       | 48.4   | 30/62       | 52.9   | 18/34       |                   |
| ARR             | 1.80         | (1.09-2.98) | 1.25   | (0.78-2.00) | 1.69   | (0.88-3.25) | 1.01   | (0.63-1.63) | 1.84   | (0.81-4.19) | 1.83   | (0.61-5.50) |                   |
| Group 3 (n=150) |              |             |        |             |        |             |        |             |        |             |        |             |                   |
| Remission       | 65.1         | 56/86       | 63.8   | 51/80       | 73.1   | 49/67       | 74.0   | 57/77       | 72.4   | 55/76       | 71.4   | 40/56       |                   |
| ARR             | 1.61         | (0.98-2.65) | 1.36   | (0.86-2.13) | 2.03   | (1.07-3.84) | 1.46   | (0.96-2.23) | 2.39   | (1.07-5.32) | 2.23   | (0.75-6.61) |                   |
| Group 4 (n=110) |              |             |        |             |        |             |        |             |        |             |        |             |                   |
| Remission       | 63.9         | 39/61       | 63.0   | 29/46       | 63.9   | 39/61       | 59.6   | 34/57       | 63.8   | 37/58       | 63.6   | 28/44       |                   |
| ARR             | 1.57         | (0.94-2.62) | 1.36   | (0.85-2.17) | 2.11   | (1.11-4.02) | 1.30   | (0.83-2.02) | 2.18   | (0.97-4.92) | 1.87   | (0.62-5.61) |                   |
| Group 5 (n=40)  |              |             |        |             |        |             |        |             |        |             |        |             |                   |
| Remission       | 54.2         | 13/24       | 36.8   | 7/19        | 52.2   | 12/23       | 42.9   | 9/21        | 56.0   | 14/25       | 36.4   | 4/11        |                   |
| ARR             | 1.66         | (0.95-2.89) | 1.07   | (0.60-1.90) | 1.70   | (0.83-3.50) | 1.09   | (0.63-1.91) | 2.07   | (0.88-4.88) | 1.99   | (0.62-6.37) |                   |
| Group 6 (n=54)  |              |             |        |             |        |             |        |             |        |             |        |             |                   |
| Remission       | 74.2         | 23/31       | 76.0   | 19/25       | 56.5   | 13/23       | 60.9   | 14/23       | 65.4   | 17/26       | 73.3   | 11/15       |                   |
| ARR             | 1.83         | (1.09-3.05) | 1.49   | (0.93-2.37) | 1.68   | (0.84-3.37) | 1.30   | (0.79-2.13) | 2.29   | (1.00-5.22) | 2.36   | (0.77-7.24) |                   |

Abbreviations: ARR, Adjusted relative risk; LDL, low-density lipoprotein cholesterol; RYGB, Roux-en-Y gastric bypass.

<sup>a</sup> Among participants with high LDL at baseline, observed remission is reported. Poisson mixed models with robust error variance were used to model remission of high LDL, with weight trajectory group membership, time (follow-up assessment) and a time x weight trajectory group interaction term, as well as site, baseline age and smoking status, which were related to missing follow-up data, as fixed effects. Trajectory groups, shown in Figure 2 of the main results, are ordered from worst (1) to best (6) 7-year weight change. Adjusted relative risks of remission in comparison to group 1 are reported by time point.

<sup>b</sup> For weight trajectory group.

<sup>c</sup> For weight trajectory group and time interaction.

**eTable 7c.** Remission of High Triglycerides<sup>a</sup> by RYGB Weight Trajectory Group Membership, by Time Point in Relation to Bariatric Surgery

|                           | % <b>, No./Total</b> |             |               |             |               |             |               |             |               |             |               |             | <b>P</b>            |
|---------------------------|----------------------|-------------|---------------|-------------|---------------|-------------|---------------|-------------|---------------|-------------|---------------|-------------|---------------------|
|                           | <b>Year 1</b>        |             | <b>Year 2</b> |             | <b>Year 3</b> |             | <b>Year 4</b> |             | <b>Year 5</b> |             | <b>Year 7</b> |             |                     |
| <b>High triglycerides</b> |                      |             |               |             |               |             |               |             |               |             |               |             | <0.001 <sup>b</sup> |
| Group 1 (n=19)            |                      |             |               |             |               |             |               |             |               |             |               |             | 0.03 <sup>c</sup>   |
| Remission                 | 76.9                 | 10/13       | 81.8          | 9/11        | 63.6          | 7/11        | 70.0          | 7/10        | 50.0          | 3/6         | 80.0          | 4/5         |                     |
| ARR                       | Ref                  |             | Ref           |             | Ref           |             | Ref           |             | Ref           |             | Ref           |             |                     |
| Group 2 (n=74)            |                      |             |               |             |               |             |               |             |               |             |               |             |                     |
| Remission                 | 86.8                 | 33/38       | 88.9          | 32/36       | 75.8          | 25/33       | 67.7          | 23/34       | 80.6          | 29/36       | 73.9          | 17/23       |                     |
| ARR                       | 1.07                 | (0.79-1.46) | 1.08          | (0.82-1.44) | 1.15          | (0.73-1.79) | 0.90          | (0.60-1.35) | 1.35          | (0.67-2.72) | 0.94          | (0.68-1.30) |                     |
| Group 3 (n=92)            |                      |             |               |             |               |             |               |             |               |             |               |             |                     |
| Remission                 | 94.6                 | 53/56       | 93.6          | 44/47       | 91.4          | 32/35       | 88.6          | 39/44       | 93.2          | 41/44       | 81.6          | 31/38       |                     |
| ARR                       | 1.19                 | (0.89-1.59) | 1.16          | (0.88-1.53) | 1.38          | (0.91-2.11) | 1.22          | (0.85-1.75) | 1.62          | (0.81-3.22) | 1.04          | (0.79-1.38) |                     |
| Group 4 (n=89)            |                      |             |               |             |               |             |               |             |               |             |               |             |                     |
| Remission                 | 98.0                 | 50/51       | 97.4          | 38/39       | 93.6          | 44/47       | 90.2          | 37/41       | 100.0         | 44/44       | 93.8          | 30/32       |                     |
| ARR                       | 1.21                 | (0.91-1.60) | 1.20          | (0.92-1.57) | 1.43          | (0.94-2.18) | 1.22          | (0.85-1.75) | 1.71          | (0.87-3.38) | 1.18          | (0.91-1.52) |                     |
| Group 5 (n=26)            |                      |             |               |             |               |             |               |             |               |             |               |             |                     |
| Remission                 | 76.5                 | 13/17       | 70.0          | 7/10        | 68.8          | 11/16       | 73.3          | 11/15       | 92.3          | 12/13       | 88.9          | 8/9         |                     |
| ARR                       | 0.94                 | (0.65-1.36) | 0.92          | (0.58-1.45) | 1.02          | (0.61-1.71) | 0.99          | (0.64-1.54) | 1.63          | (0.81-3.27) | 1.10          | (0.80-1.51) |                     |
| Group 6 (n=39)            |                      |             |               |             |               |             |               |             |               |             |               |             |                     |
| Remission                 | 96.0                 | 24/25       | 100.0         | 22/22       | 100.0         | 20/20       | 100.0         | 16/16       | 100.0         | 20/20       | 100.0         | 13/13       |                     |
| ARR                       | 1.20                 | (0.89-1.60) | 1.22          | (0.94-1.59) | 1.53          | (1.01-2.31) | 1.36          | (0.96-1.92) | 1.72          | (0.87-3.40) | 1.25          | (0.98-1.59) |                     |

Abbreviations: ARR, Adjusted relative risk; RYGB, Roux-en-Y gastric bypass.

<sup>a</sup> Among participants with high triglycerides at baseline, observed remission is reported. Poisson mixed models with robust error variance were used to model remission of high triglycerides, with weight trajectory group membership, time (follow-up assessment) and a time x weight trajectory group interaction term, as well as site, baseline age and smoking status, which were related to missing follow-up data, as fixed effects. Trajectory groups, shown in Figure 2 of the main results, are ordered from worst (1) to best (6) 7-year weight change. Adjusted relative risks of remission in comparison to group 1 are reported by time point.

<sup>b</sup> For weight trajectory group.

<sup>c</sup> For weight trajectory group and time interaction.

**eTable 7d.** Remission of Low HDL<sup>a</sup> by RYGB Weight Trajectory Group Membership, by Time Point in Relation to Bariatric Surgery

|                 | % <b>, No./Total</b> |             |               |             |               |             |               |             |               |             |               |             | <b>P</b>            |
|-----------------|----------------------|-------------|---------------|-------------|---------------|-------------|---------------|-------------|---------------|-------------|---------------|-------------|---------------------|
|                 | <b>Year 1</b>        |             | <b>Year 2</b> |             | <b>Year 3</b> |             | <b>Year 4</b> |             | <b>Year 5</b> |             | <b>Year 7</b> |             |                     |
| <b>Low HDL</b>  |                      |             |               |             |               |             |               |             |               |             |               |             | <0.001 <sup>b</sup> |
| Group 1 (n=37)  |                      |             |               |             |               |             |               |             |               |             |               |             | 0.04 <sup>c</sup>   |
| Remission       | 61.5                 | 16/26       | 61.9          | 13/21       | 50.0          | 11/22       | 45.8          | 11/24       | 39.1          | 9/23        | 53.8          | 7/13        |                     |
| ARR             | Ref                  |             | Ref           |             | Ref           |             | Ref           |             | Ref           |             | Ref           |             |                     |
| Group 2 (n=135) |                      |             |               |             |               |             |               |             |               |             |               |             |                     |
| Remission       | 70.5                 | 62/88       | 77.3          | 58/75       | 76.6          | 49/64       | 67.1          | 47/70       | 75.7          | 53/70       | 72.1          | 31/43       |                     |
| ARR             | 1.26                 | (0.90-1.76) | 1.38          | (0.95-1.98) | 1.46          | (0.99-2.14) | 1.30          | (0.88-1.92) | 1.76          | (1.13-2.75) | 1.58          | (0.95-2.63) |                     |
| Group 3 (n=179) |                      |             |               |             |               |             |               |             |               |             |               |             |                     |
| Remission       | 78.7                 | 96/122      | 86.0          | 86/100      | 92.0          | 92/100      | 88.4          | 84/95       | 83.3          | 80/96       | 84.5          | 60/71       |                     |
| ARR             | 1.36                 | (0.98-1.88) | 1.57          | (1.10-2.23) | 1.76          | (1.21-2.56) | 1.71          | (1.18-2.47) | 1.95          | (1.27-3.02) | 1.96          | (1.20-3.20) |                     |
| Group 4 (n=173) |                      |             |               |             |               |             |               |             |               |             |               |             |                     |
| Remission       | 76.1                 | 83/109      | 92.5          | 86/93       | 90.5          | 86/95       | 82.4          | 75/91       | 86.2          | 81/94       | 93.9          | 62/66       |                     |
| ARR             | 1.30                 | (0.93-1.81) | 1.63          | (1.15-2.33) | 1.72          | (1.18-2.51) | 1.56          | (1.07-2.27) | 2.01          | (1.30-3.10) | 2.07          | (1.27-3.37) |                     |
| Group 5 (n=47)  |                      |             |               |             |               |             |               |             |               |             |               |             |                     |
| Remission       | 68.6                 | 24/35       | 76.2          | 16/21       | 78.9          | 15/19       | 76.2          | 16/21       | 80.8          | 21/26       | 100.0         | 14/14       |                     |
| ARR             | 1.22                 | (0.83-1.79) | 1.41          | (0.95-2.10) | 1.69          | (1.11-2.56) | 1.59          | (1.05-2.40) | 2.01          | (1.27-3.19) | 2.35          | (1.43-3.87) |                     |
| Group 6 (n=75)  |                      |             |               |             |               |             |               |             |               |             |               |             |                     |
| Remission       | 89.1                 | 49/55       | 97.6          | 40/41       | 97.5          | 39/40       | 97.5          | 39/40       | 97.8          | 44/45       | 91.2          | 31/34       |                     |
| ARR             | 1.54                 | (1.11-2.13) | 1.74          | (1.22-2.47) | 1.85          | (1.27-2.69) | 1.85          | (1.28-2.67) | 2.27          | (1.48-3.49) | 2.07          | (1.26-3.38) |                     |

Abbreviations: ARR, Adjusted relative risk; HDL, high-density lipoprotein cholesterol; RYGB, Roux-en-Y gastric bypass.

<sup>a</sup> Among participants with low HDL at baseline, observed remission is reported. Poisson mixed models with robust error variance were used to model remission of low HDL, with weight trajectory group membership, time (follow-up assessment) and a time x weight trajectory group interaction term, as well as site, baseline age and smoking status, which were related to missing follow-up data, as fixed effects. Trajectory groups, shown in Figure 2 of the main results, are ordered from worst (1) to best (6) 7-year weight change. Adjusted relative risks of remission in comparison to group 1 are reported by time point.

<sup>b</sup> For weight trajectory group.

<sup>c</sup> For weight trajectory group and time interaction.



**eTable 7e.** Remission of Hypertension<sup>a</sup> by RYGB Weight Trajectory Group Membership, by Time Point in Relation to Bariatric Surgery

|                     | % <b>, No./Total</b> |             |               |             |               |             |               |             |               |             |               |             | <b>P</b>            |
|---------------------|----------------------|-------------|---------------|-------------|---------------|-------------|---------------|-------------|---------------|-------------|---------------|-------------|---------------------|
|                     | <b>Year 1</b>        |             | <b>Year 2</b> |             | <b>Year 3</b> |             | <b>Year 4</b> |             | <b>Year 5</b> |             | <b>Year 7</b> |             |                     |
| <b>Hypertension</b> |                      |             |               |             |               |             |               |             |               |             |               |             | <0.001 <sup>b</sup> |
| Group 1 (n=59)      |                      |             |               |             |               |             |               |             |               |             |               |             | <0.001 <sup>c</sup> |
| Remission           | 40.8                 | 20/49       | 37.5          | 15/40       | 24.4          | 10/41       | 16.7          | 7/42        | 25.0          | 10/40       | 20.7          | 6/29        |                     |
| ARR                 | Ref                  |             | Ref           |             | Ref           |             | Ref           |             | Ref           |             | Ref           |             |                     |
| Group 2 (n=269)     |                      |             |               |             |               |             |               |             |               |             |               |             |                     |
| Remission           | 37.7                 | 81/215      | 31.4          | 53/169      | 26.2          | 44/168      | 28.7          | 47/164      | 25.4          | 46/181      | 21.6          | 24/111      |                     |
| ARR                 | 0.86                 | (0.59-1.24) | 0.82          | (0.56-1.19) | 0.97          | (0.58-1.62) | 1.44          | (0.82-2.54) | 1.01          | (0.56-1.82) | 1.00          | (0.50-1.99) |                     |
| Group 3 (n=313)     |                      |             |               |             |               |             |               |             |               |             |               |             |                     |
| Remission           | 47.1                 | 123/261     | 42.9          | 88/205      | 41.2          | 77/187      | 32.6          | 63/193      | 31.4          | 65/207      | 28.5          | 41/144      |                     |
| ARR                 | 1.06                 | (0.74-1.50) | 1.04          | (0.73-1.48) | 1.46          | (0.90-2.37) | 1.55          | (0.89-2.72) | 1.27          | (0.72-2.24) | 1.18          | (0.61-2.29) |                     |
| Group 4 (n=292)     |                      |             |               |             |               |             |               |             |               |             |               |             |                     |
| Remission           | 46.8                 | 110/235     | 52.8          | 105/199     | 45.8          | 88/192      | 36.0          | 67/186      | 38.7          | 75/194      | 37.7          | 49/130      |                     |
| ARR                 | 1.03                 | (0.72-1.47) | 1.23          | (0.87-1.73) | 1.60          | (0.99-2.58) | 1.78          | (1.03-3.1)  | 1.55          | (0.88-2.71) | 1.75          | (0.92-3.31) |                     |
| Group 5 (n=83)      |                      |             |               |             |               |             |               |             |               |             |               |             |                     |
| Remission           | 37.8                 | 28/74       | 24.1          | 14/58       | 24.6          | 15/61       | 31.3          | 20/64       | 28.1          | 18/64       | 40.5          | 15/37       |                     |
| ARR                 | 1.03                 | (0.67-1.58) | 0.65          | (0.37-1.13) | 1.07          | (0.59-1.96) | 1.91          | (1.03-3.55) | 1.48          | (0.78-2.82) | 2.27          | (1.13-4.53) |                     |
| Group 6 (n=140)     |                      |             |               |             |               |             |               |             |               |             |               |             |                     |
| Remission           | 57.7                 | 71/123      | 55.4          | 62/112      | 61.5          | 56/91       | 52.9          | 54/102      | 47.4          | 45/95       | 47.8          | 33/69       |                     |
| ARR                 | 1.19                 | (0.83-1.71) | 1.18          | (0.82-1.68) | 2.04          | (1.26-3.29) | 2.44          | (1.41-4.24) | 1.89          | (1.07-3.34) | 2.10          | (1.1-4.01)  |                     |

---

Abbreviations: ARR, Adjusted relative risk; RYGB, Roux-en-Y gastric bypass.

<sup>a</sup> Among participants with hypertension at baseline, observed remission is reported. Poisson mixed models with robust error variance were used to model remission of hypertension, with weight trajectory group membership, time (follow-up assessment) and a time x weight trajectory group interaction term, as well as site, baseline age and smoking status, which were related to missing follow-up data, as fixed effects. Trajectory groups, shown in Figure 2 of the main results, are ordered from worst (1) to best (6) 7-year weight change. Adjusted relative risks of remission in comparison to group 1 are reported by time point.

<sup>b</sup> For weight trajectory group.

<sup>c</sup> For weight trajectory group and time interaction.
